# Supplementary material for: Molecular Mechanism of Different Rooting Capacity between Two Clones of Taxodium hybrid ‘Zhongshanshan’
Source: MDPI journal article supplement (doi:10.3390/ijms25042427), 2024-02-19
Supplement: s1 [file s1]

**Table S1.** Summary of the clean reads data

| Sample_name | Total_reads | Total_bases   | GC_content | Q20    | Q30    |
|-------------|-------------|---------------|------------|--------|--------|
| 149-0 d-1   | 44,730,322  | 6,709,548,300 | 43.50%     | 98.06% | 94.16% |
| 149-0 d-2   | 40,402,440  | 6,060,366,000 | 43.36%     | 97.39% | 92.64% |
| 149-0 d-3   | 42,377,504  | 6,356,625,600 | 43.29%     | 97.82% | 93.58% |
| 118-0 d-1   | 42,238,650  | 6,335,797,500 | 43.12%     | 97.49% | 92.80% |
| 118-0 d-2   | 38,289,070  | 5,743,360,500 | 43.31%     | 97.49% | 92.83% |
| 118-0 d-3   | 45,227,224  | 6,784,083,600 | 43.30%     | 97.74% | 93.47% |
| 149-28 d-1  | 40,920,626  | 6,138,093,900 | 44.09%     | 97.36% | 92.64% |
| 149-28 d-2  | 40,673,634  | 6,101,045,100 | 49.86%     | 97.10% | 92.37% |
| 149-28 d-3  | 42,557,856  | 6,383,678,400 | 43.48%     | 97.50% | 92.87% |
| 118-28 d-1  | 39,647,060  | 5,947,059,000 | 43.51%     | 97.43% | 92.76% |
| 118-28 d-2  | 46,371,278  | 6,955,691,700 | 43.63%     | 97.63% | 93.22% |
| 118-28 d-3  | 43,072,894  | 6,460,934,100 | 43.56%     | 97.71% | 93.37% |
| 149-56 d-1  | 39,086,508  | 5,862,976,200 | 43.16%     | 97.30% | 92.47% |
| 149-56 d-2  | 45,272,780  | 6,790,917,000 | 43.29%     | 97.67% | 93.33% |
| 149-56 d-3  | 40,304,572  | 6,045,685,800 | 43.45%     | 97.49% | 92.87% |
| 118-56 d-1  | 45,976,824  | 6,896,523,600 | 43.18%     | 97.70% | 93.38% |
| 118-56 d-2  | 44,998,956  | 6,749,843,400 | 43.53%     | 97.70% | 93.38% |
| 118-56 d-3  | 42,407,586  | 6,361,137,900 | 45.16%     | 97.24% | 92.39% |

**Note:** Total\_Reads is the number of reads (a pair of paired-end reads is denoted as two reads); Total\_bases is the total base number; GC\_content is the percentage of the number of bases G and C in the total number of bases; Q20 and Q30 are the percentage of bases with Phred values >20 and >30 in the total number of bases, respectively.
