# Supplementary material for: Molecular Mechanism of Different Rooting Capacity between Two Clones of Taxodium hybrid ‘Zhongshanshan’
Source: MDPI journal article supplement (doi:10.3390/ijms25042427), 2024-02-19
Supplement: s1 [file s1]

**Table S3:** Primers used in qRT-PCR

| <b>Unigenes</b>     | <b>Primer F</b>         | <b>Primer R</b>       |
|---------------------|-------------------------|-----------------------|
| <i>Unigene6524</i>  | TCTCAACCTTGGGCTTGGAT    | GCAGTGCAAGTAAAGCTCCA  |
| <i>Unigene31114</i> | TACTCTGCCCACGAACAAC     | CAAAGAGCAAGCCAGCTGAT  |
| <i>Unigene29112</i> | TGTCAAGGATTACCTTTGTCCCT | CTTGCAAGAGTGATTCCCAA  |
| <i>Unigene26972</i> | GAGGAGCTGCGCTTAATGTT    | TGTTTCCACGTAGCGGAGAT  |
| <i>Unigene36327</i> | GCTTGGCATGAAATGGTTGC    | AAGGACGGACTGGGATCAAA  |
| <i>Unigene15411</i> | AGATGTGGCATGATGCTTGG    | GCTTTCTGTGAGGGTTGCTT  |
| <i>ThAPRT</i>       | TCCACAGGTTCTTGAATCGCT   | TGACTTGAGCCTCATTCGCTC |
