# Supplementary material for: Molecular Mechanism of Different Rooting Capacity between Two Clones of Taxodium hybrid ‘Zhongshanshan’
Source: MDPI journal article supplement (doi:10.3390/ijms25042427), 2024-02-19
Supplement: s1 [file s1]

**Table S2.** Summary of the functional annotations of the unigenes

| <b>Description</b>                             | <b>No. of unigenes identified</b> | <b>Percentage identified</b> |
|------------------------------------------------|-----------------------------------|------------------------------|
| Total identified                               | 41,109                            | 100%                         |
| Total annotated                                | 41,101                            | 99.98%                       |
| <b>Database</b>                                |                                   |                              |
| the UniProt Knowledgebase (UniProt)            | 28,872                            | 70.23%                       |
| Pfam                                           | 29,541                            | 71.86%                       |
| Gene Ontology (GO)                             | 28,506                            | 69.34%                       |
| Kyoto Encyclopedia of Genes and Genomes (KEGG) | 12,515                            | 30.44%                       |
| KEGG Pathway                                   | 8,303                             | 20.20%                       |
| EggNOG                                         | 23,586                            | 57.37%                       |
| NCBI non-redundant protein sequences (Nr)      | 41,087                            | 99.95%                       |
