# Supplementary material for: Molecular Mechanism of Different Rooting Capacity between Two Clones of Taxodium hybrid ‘Zhongshanshan’
Source: MDPI journal article supplement (doi:10.3390/ijms25042427), 2024-02-19
Supplement: s1 [file s1]

**Table S4:** Sequence and primers of *ThAP2*

| Sequence                                                                                                                                                                                                                                                                                                                                                                                                                                                                                                                                                                                                                                                                                                                                                                                                                                                                                                                                                                                                                                                                                                                                                                                                                                                                                                                                                                                                                                                                                                                                                                                                                                                                                                                                                                    | Primer                                                                                       |
|-----------------------------------------------------------------------------------------------------------------------------------------------------------------------------------------------------------------------------------------------------------------------------------------------------------------------------------------------------------------------------------------------------------------------------------------------------------------------------------------------------------------------------------------------------------------------------------------------------------------------------------------------------------------------------------------------------------------------------------------------------------------------------------------------------------------------------------------------------------------------------------------------------------------------------------------------------------------------------------------------------------------------------------------------------------------------------------------------------------------------------------------------------------------------------------------------------------------------------------------------------------------------------------------------------------------------------------------------------------------------------------------------------------------------------------------------------------------------------------------------------------------------------------------------------------------------------------------------------------------------------------------------------------------------------------------------------------------------------------------------------------------------------|----------------------------------------------------------------------------------------------|
| ATGTGGGATCTGAACAATATGCCCCGAGGAGCCTAGGCCTGTG<br>GAAGTGGAGGGCCAAAACGAGAGCTTATCAAATTTCGCCTGA<br>TGATGACGTCTCGGGTTCGACTTCCATCTCTACCAGCAACTC<br>TGCTAAGATCTTTGGGTTTTCTTTTACTAACAGTGGTGATGGA<br>AAAGATCGGGAGATGAATATAAGTAATGGATCCACAGCGTT<br>ACACGCCAGTTTTTCCCAATTGAGCAGGAGATGGAGATGGA<br>GATGGAGATGGATATGGAATTAGAGCCAGTACAGCCTGAAC<br>TGCGAAGAGCCCATTTGGGTAGGACTTAAGTTTTCTTCTCGGT<br>GGGCTTCACCCAAATCCAGTGAAGCCCCCTCCACCCATGCTCA<br>TGAAGAAGAGTAGACGAGGCCCACGTTCCAGAAGTTCTCAG<br>TACCGTGGTGTTACATTCTACAGGCGCACTGGAAGATGGGAG<br>TCTCACATATGGGATTGTGGGAAACAAGTCTATCTTGGTGGA<br>TTTGACACTGCCCACGTAGCCGCCAGGGCATATGATAGGGCA<br>GCCATCAAATTCAGAGGCACGGATGCTGACATAAATTTTAGT<br>ATTGATGACTATAAGGAGGACATCCAGCAGATGAATAGTTTG<br>TCAAAGGAGGAGTTTGTGCATGTCCTTCGCCGGCAAAGCAA<br>TGGATTTCGAAGAGGAAGTTCTAAGTTCAGAGGCGTCACTC<br>AGCACAAATCTGGAAGATGGGAAGCTAGACTTGGACAACCTT<br>CTGGGCAAAAAGTATGTTTACTTAGGTTTATTCGACGACGAA<br>ATCGAAGCTGCAAGGACATATGATAAAGCAGCAATTGCATA<br>CAACGGCAAGGAAGCGGTTACTAATTTTGATCCTAAAGTATA<br>CGAAAGTGATCTAGATCTTGTAGAAACAAAAGATCTTTGTCT<br>TGGCAACTCTATTGAAAAAGAAAGCAACTTGTCAATTC AAG<br>GCAAGGGAAACGATGAGAGCAGAATGCAGTCATGTCAAAC<br>AATACCACGATTGAAGATAGGCAGCAAAATCAGAGCTTGTA<br>TTCAAACGAGTTTCACAAGCCTTGTTCAACAACACAAGGCA<br>ATAAGTTTCTGTCCTTCCAAAATGGGGAGGATTTTATCAAGTA<br>CAAGAGGCCATTTAGGTTGTTATCCCAGTTGGAAGGTAATGG<br>ACAATGGCTGGCAAGTGATGATGTGATTGTGCACCGAGGATC<br>ATCAGGGAATCCACTGCCTTCTCTTTCTCACCTTAACTACAAG<br>GGTCCAAGTATCTTGGGTGGATGCAGAGATGAGAGAAAAAG<br>AGGAGTATCAGCGATGTTTGGGAAGGGAGAAAGTATCATCAG<br>GATGGGTAAATTGTCAAATGCAGACATATGTTTCATGCTCCTCT<br>CGCAGCATCATCAGGATTCTCACCCCAAATTCTATTTCGCAAC<br>AAATTCTTCTTCTGATTGCCAACAGAAAACAGGATTTTCATGTT<br>AAGATTCAACCTACATTGTATTCAAACAATTTGCATAAAACT<br>ACTTCTTCAAATCTGGTGACCACTTATTAACTTGTCTTAG<br>GTTCTTAA | Primer F :<br>ATGTGGGATCT<br>GAACAATATG<br><br>Primer R:<br>AGAACCTAAGG<br>ACAAGTTTAAT<br>AA |
