# Supplementary material for: Molecular Mechanism of Different Rooting Capacity between Two Clones of Taxodium hybrid ‘Zhongshanshan’
Source: MDPI journal article supplement (doi:10.3390/ijms25042427), 2024-02-19
Supplement: s1 [file s1]

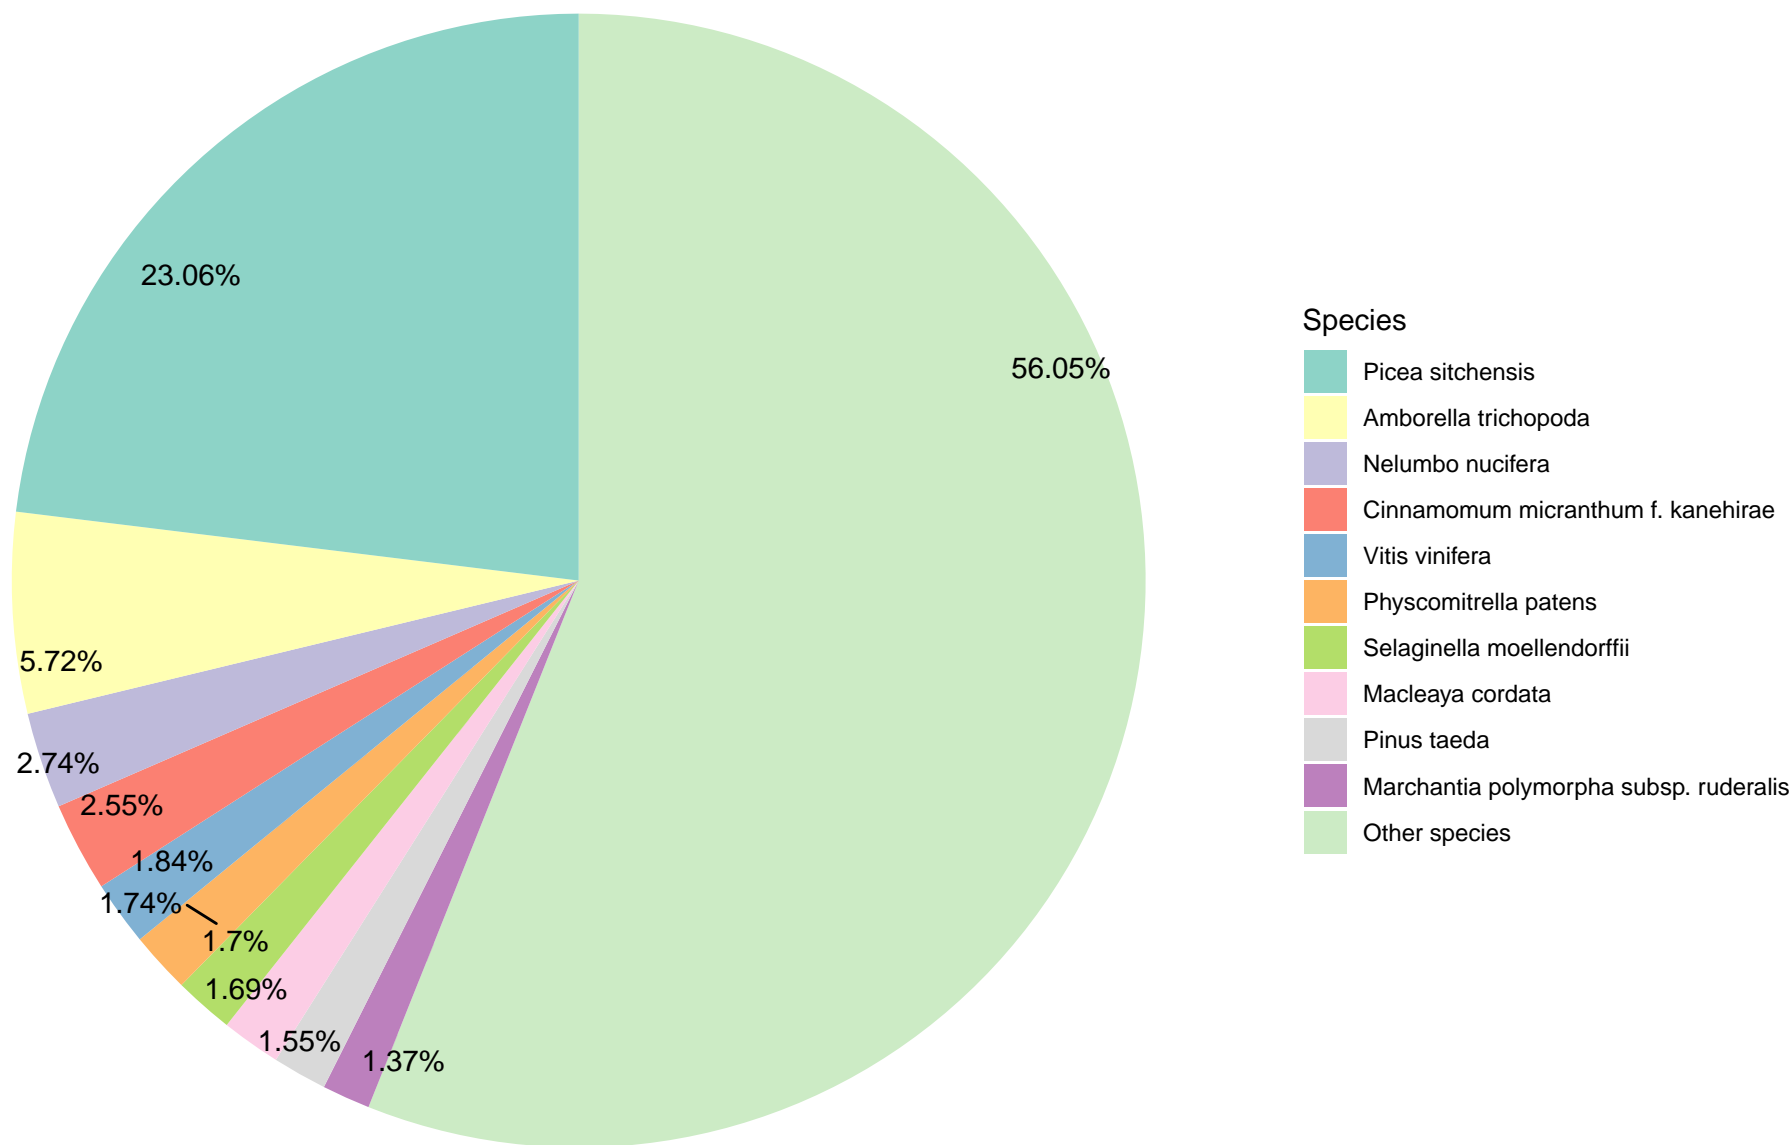

**Figure S1.** Nr annotation of the combined transcriptome data from *T. hybrid* 'Zhongshanshan 149' and *T. hybrid* 'Zhongshanshan 118'.
