# Supplementary figures and images for: Molecular Mechanism of Different Rooting Capacity between Two Clones of Taxodium hybrid ‘Zhongshanshan’
Source: MDPI journal article supplement (doi:10.3390/ijms25042427), 2024-02-19

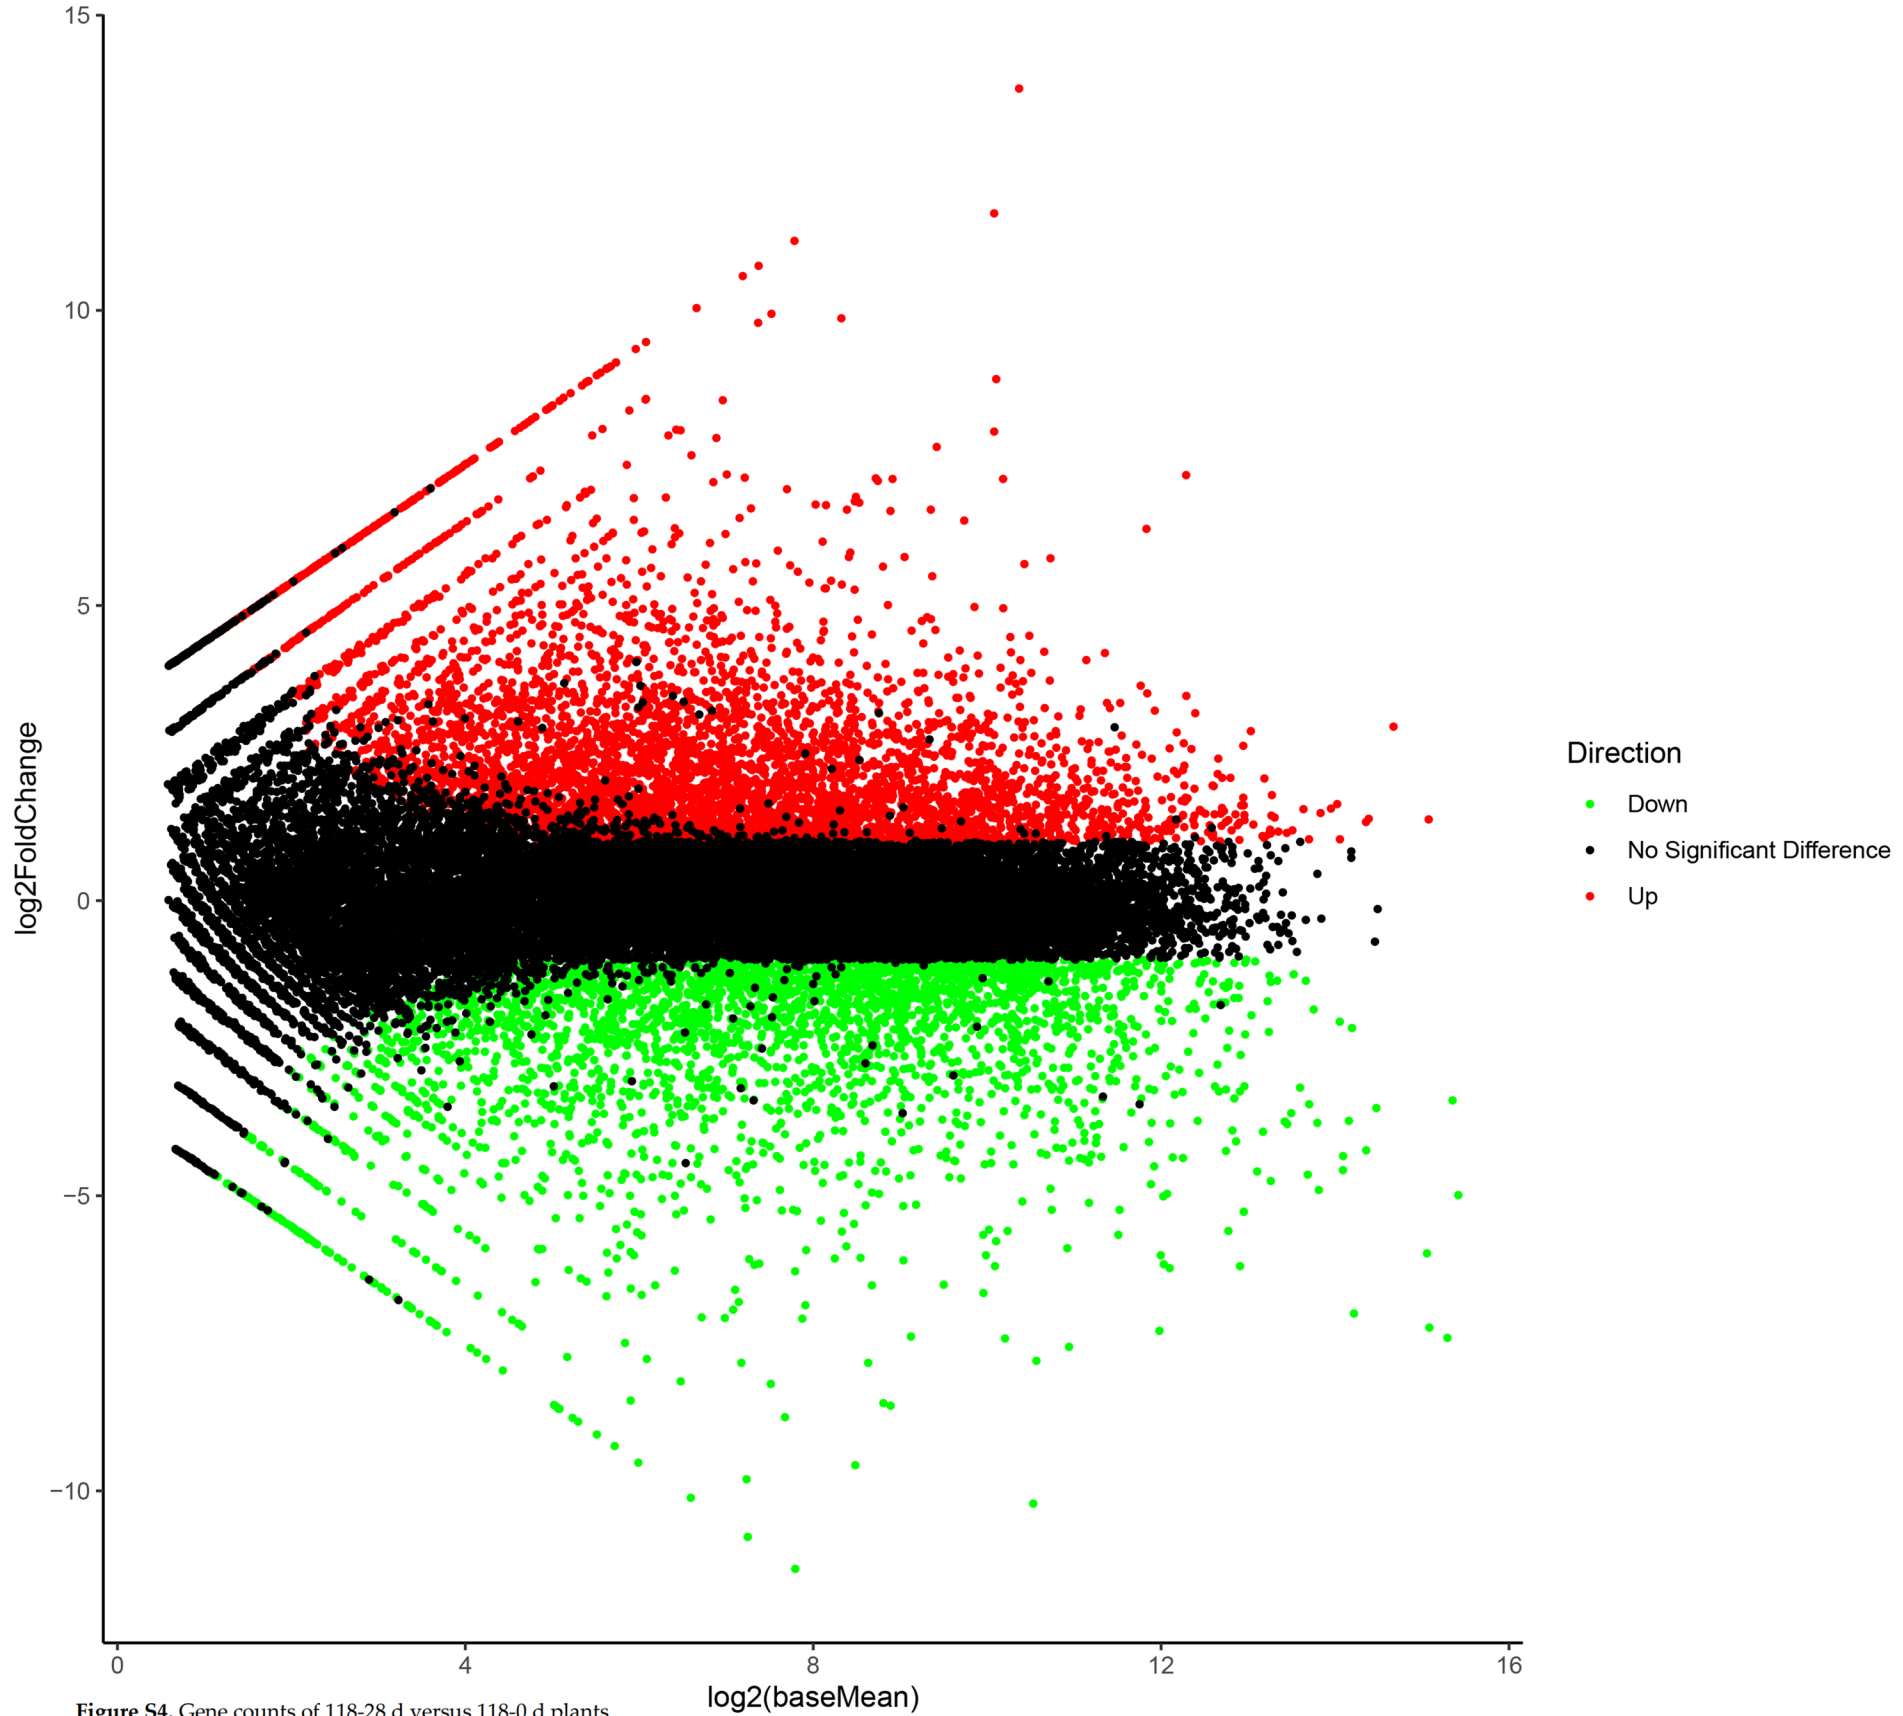

**Figure S4.** Gene counts of 118-28 d versus 118-0 d plants.

Supplement: s1 [file s1]

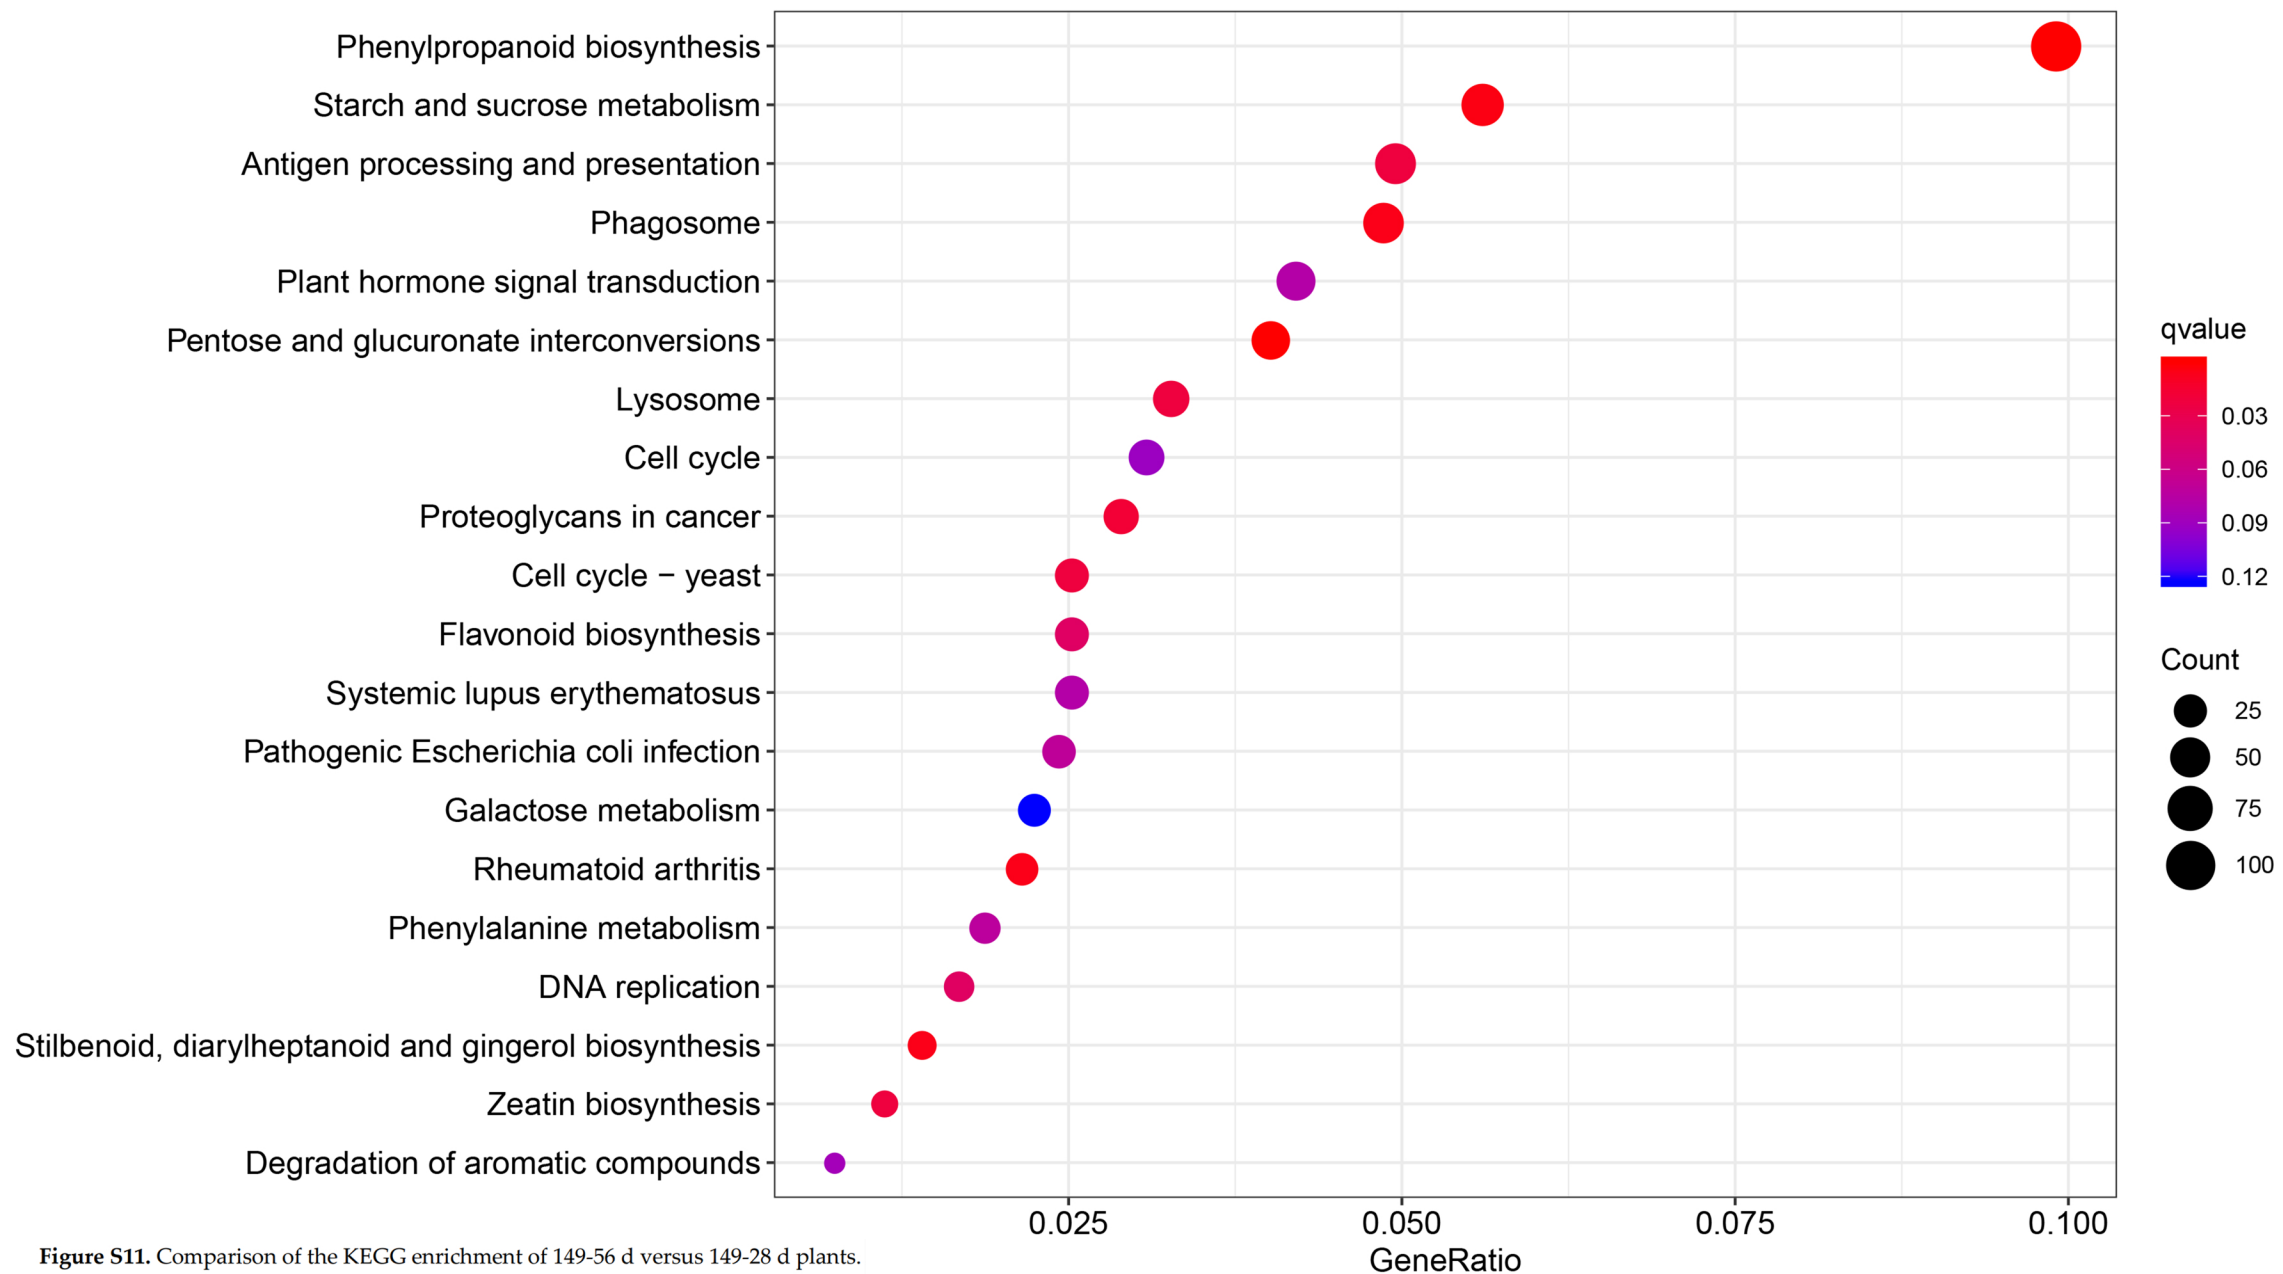

Figure S11. Comparison of the KEGG enrichment of 149-56 d versus 149-28 d plants.

Supplement: s1 [file s1]

## Top 25 of GO Enrichment

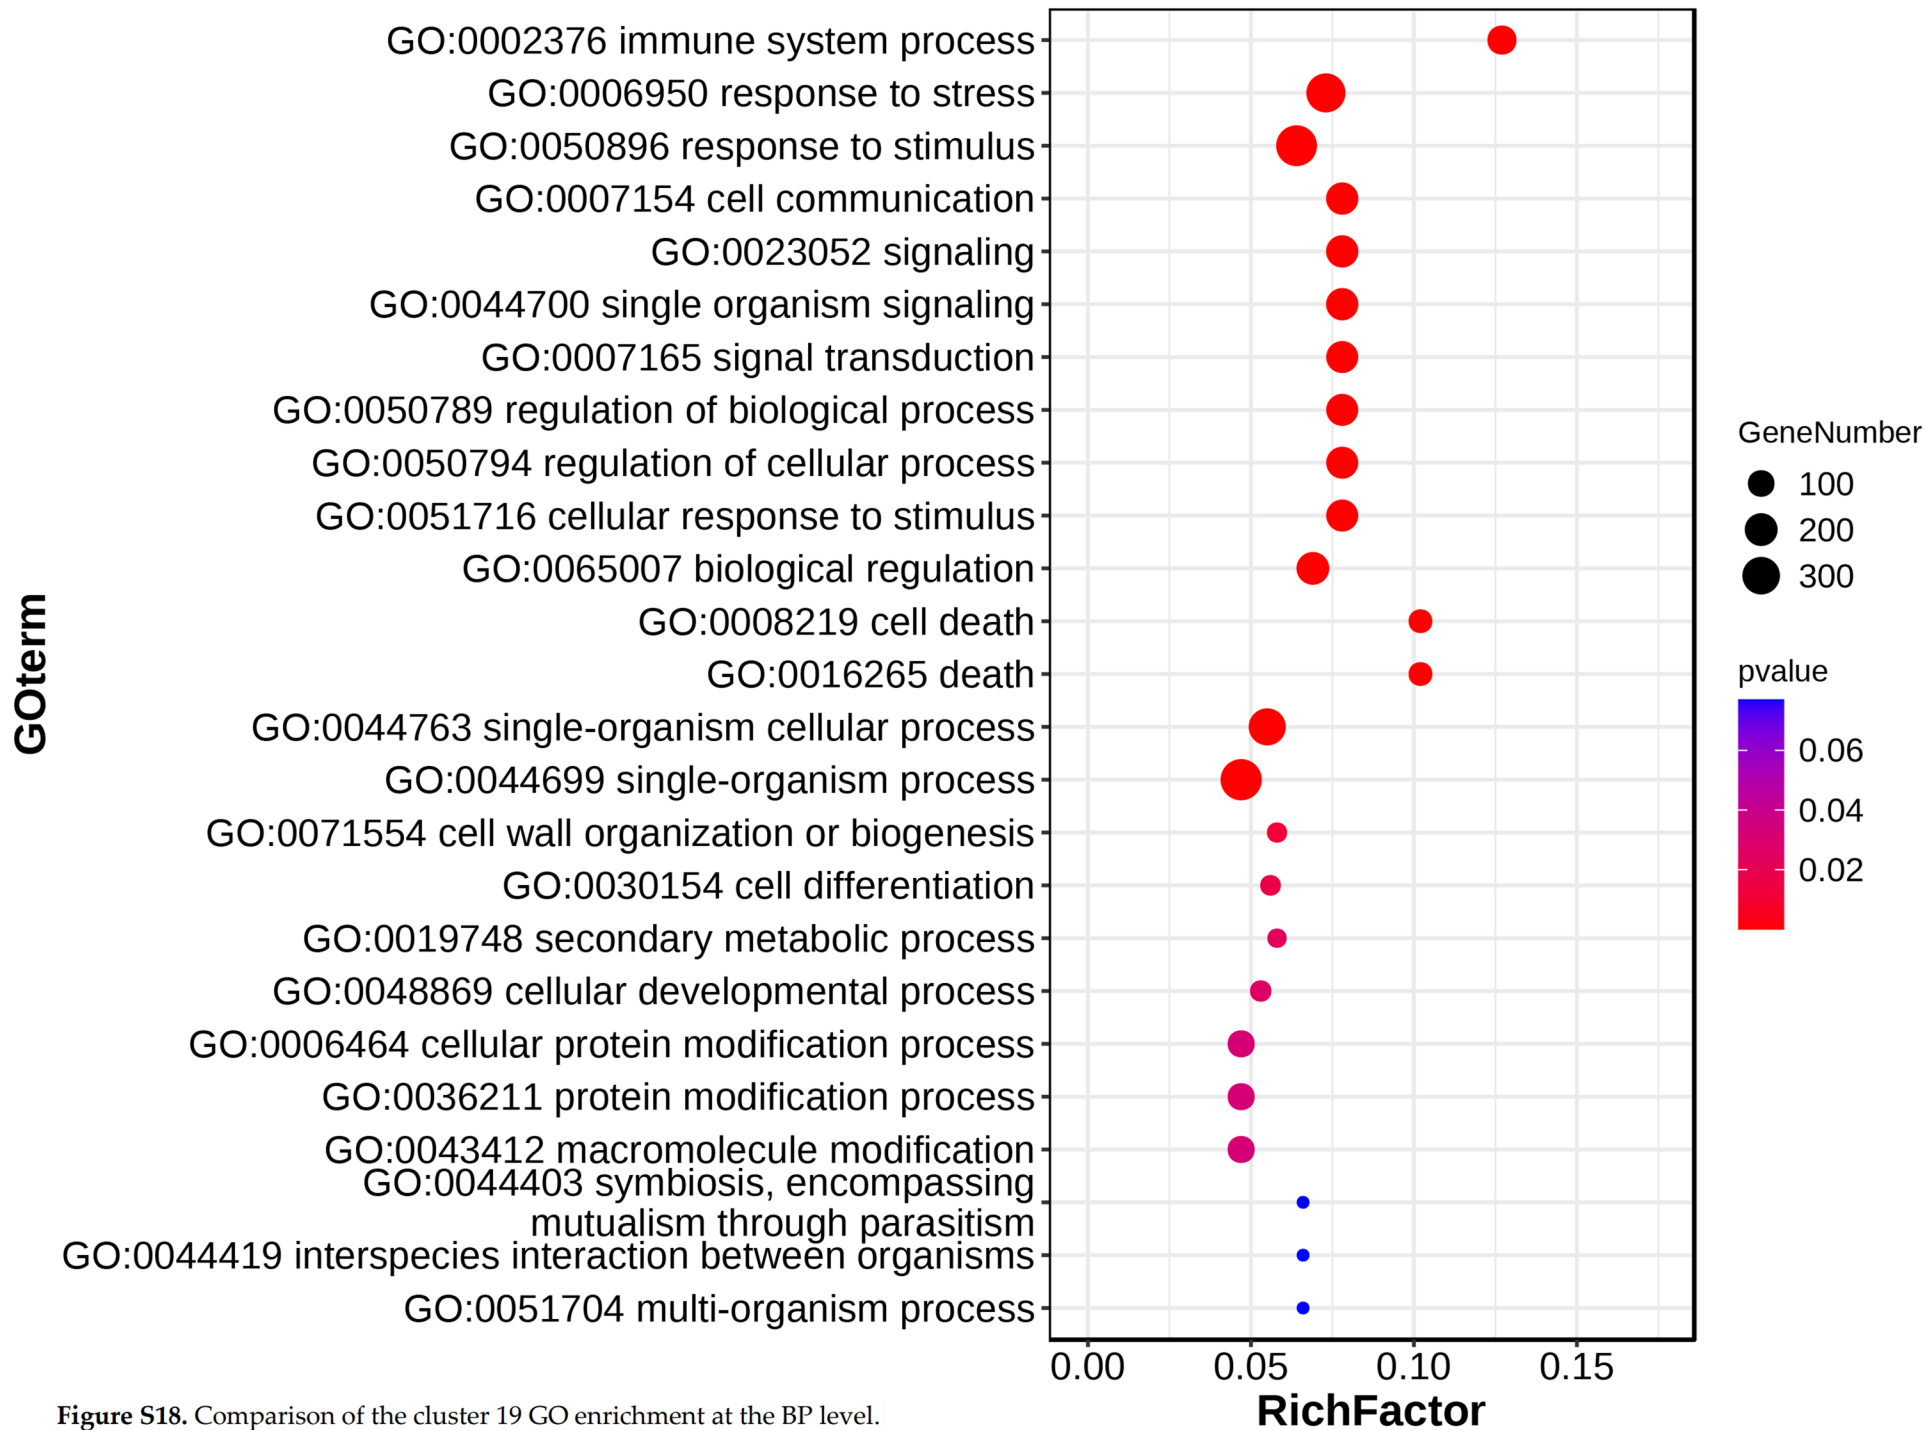

Figure S18. Comparison of the cluster 19 GO enrichment at the BP level.

Supplement: s1 [file s1]

# Top 25 of GO Enrichment

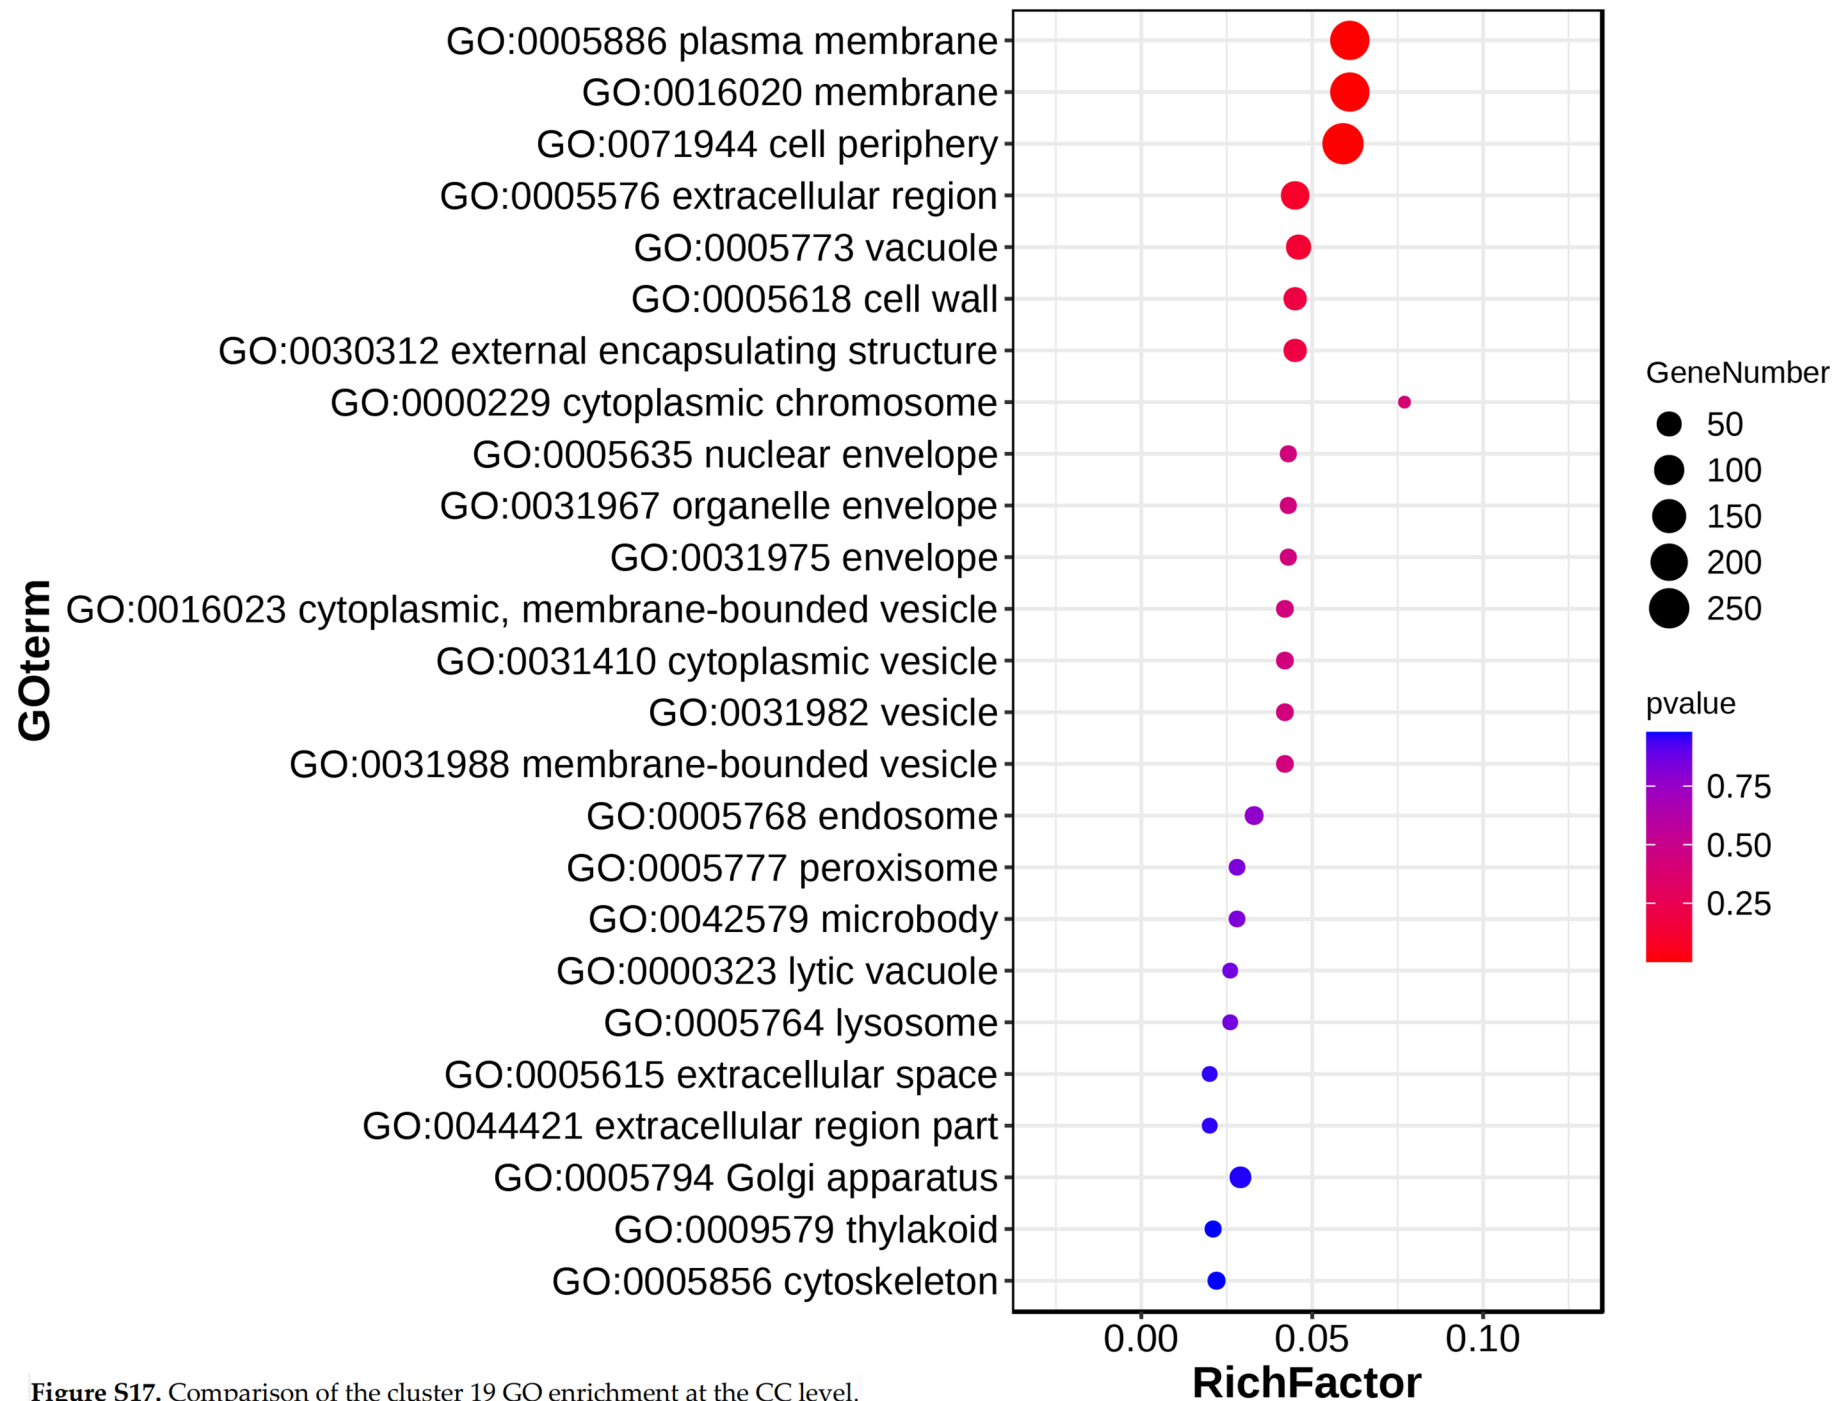

Figure S17. Comparison of the cluster 19 GO enrichment at the CC level.

Supplement: s1 [file s1]

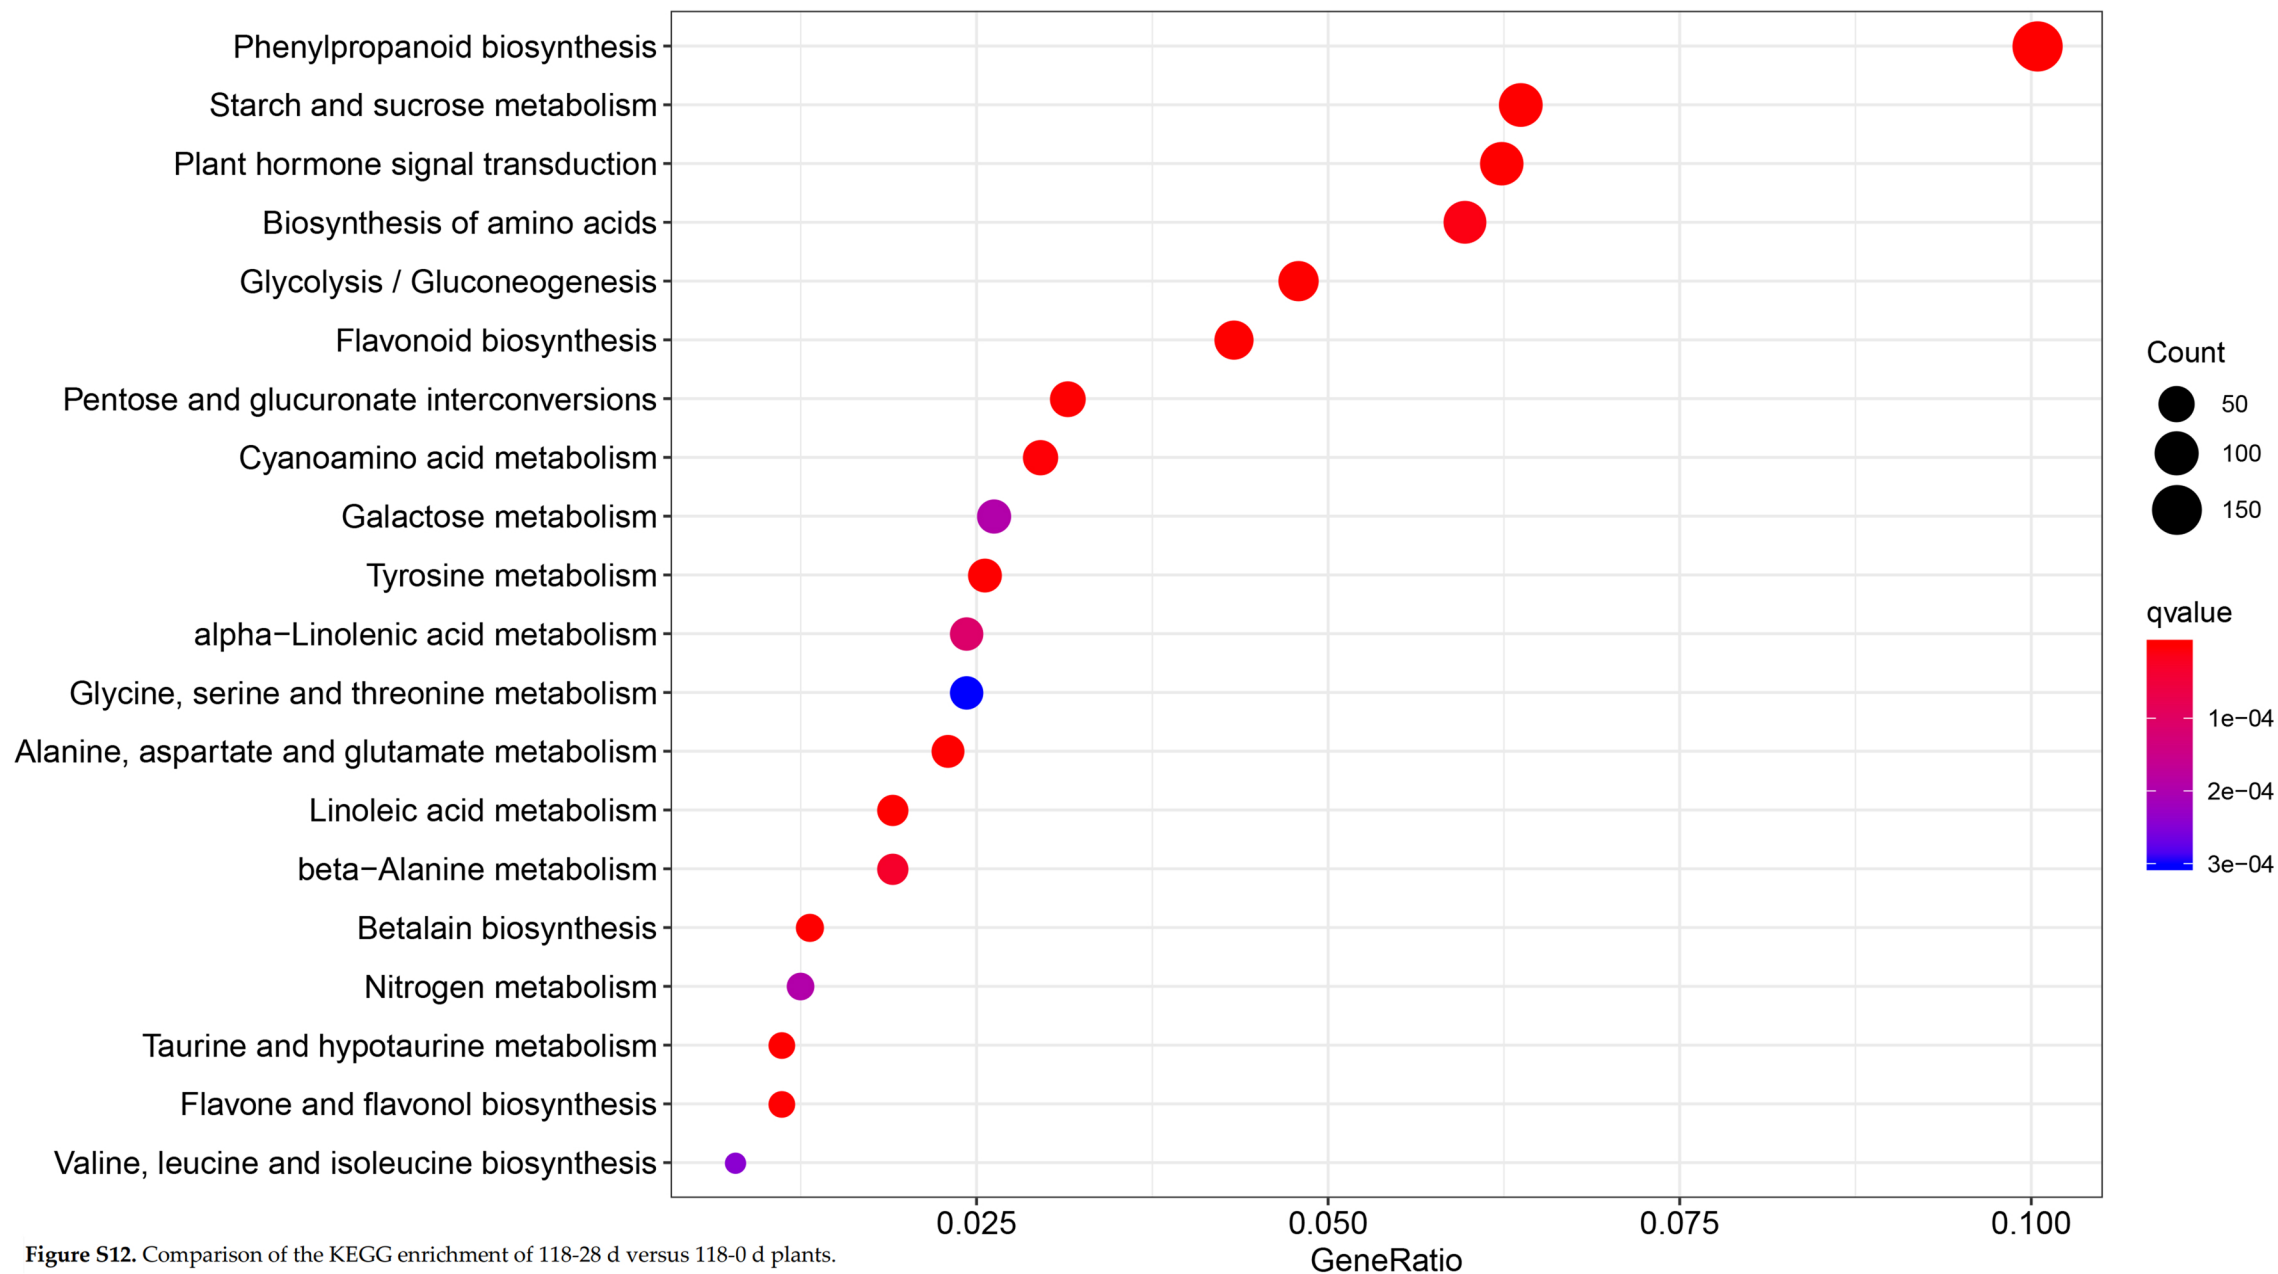

Supplement: s1 [file s1]

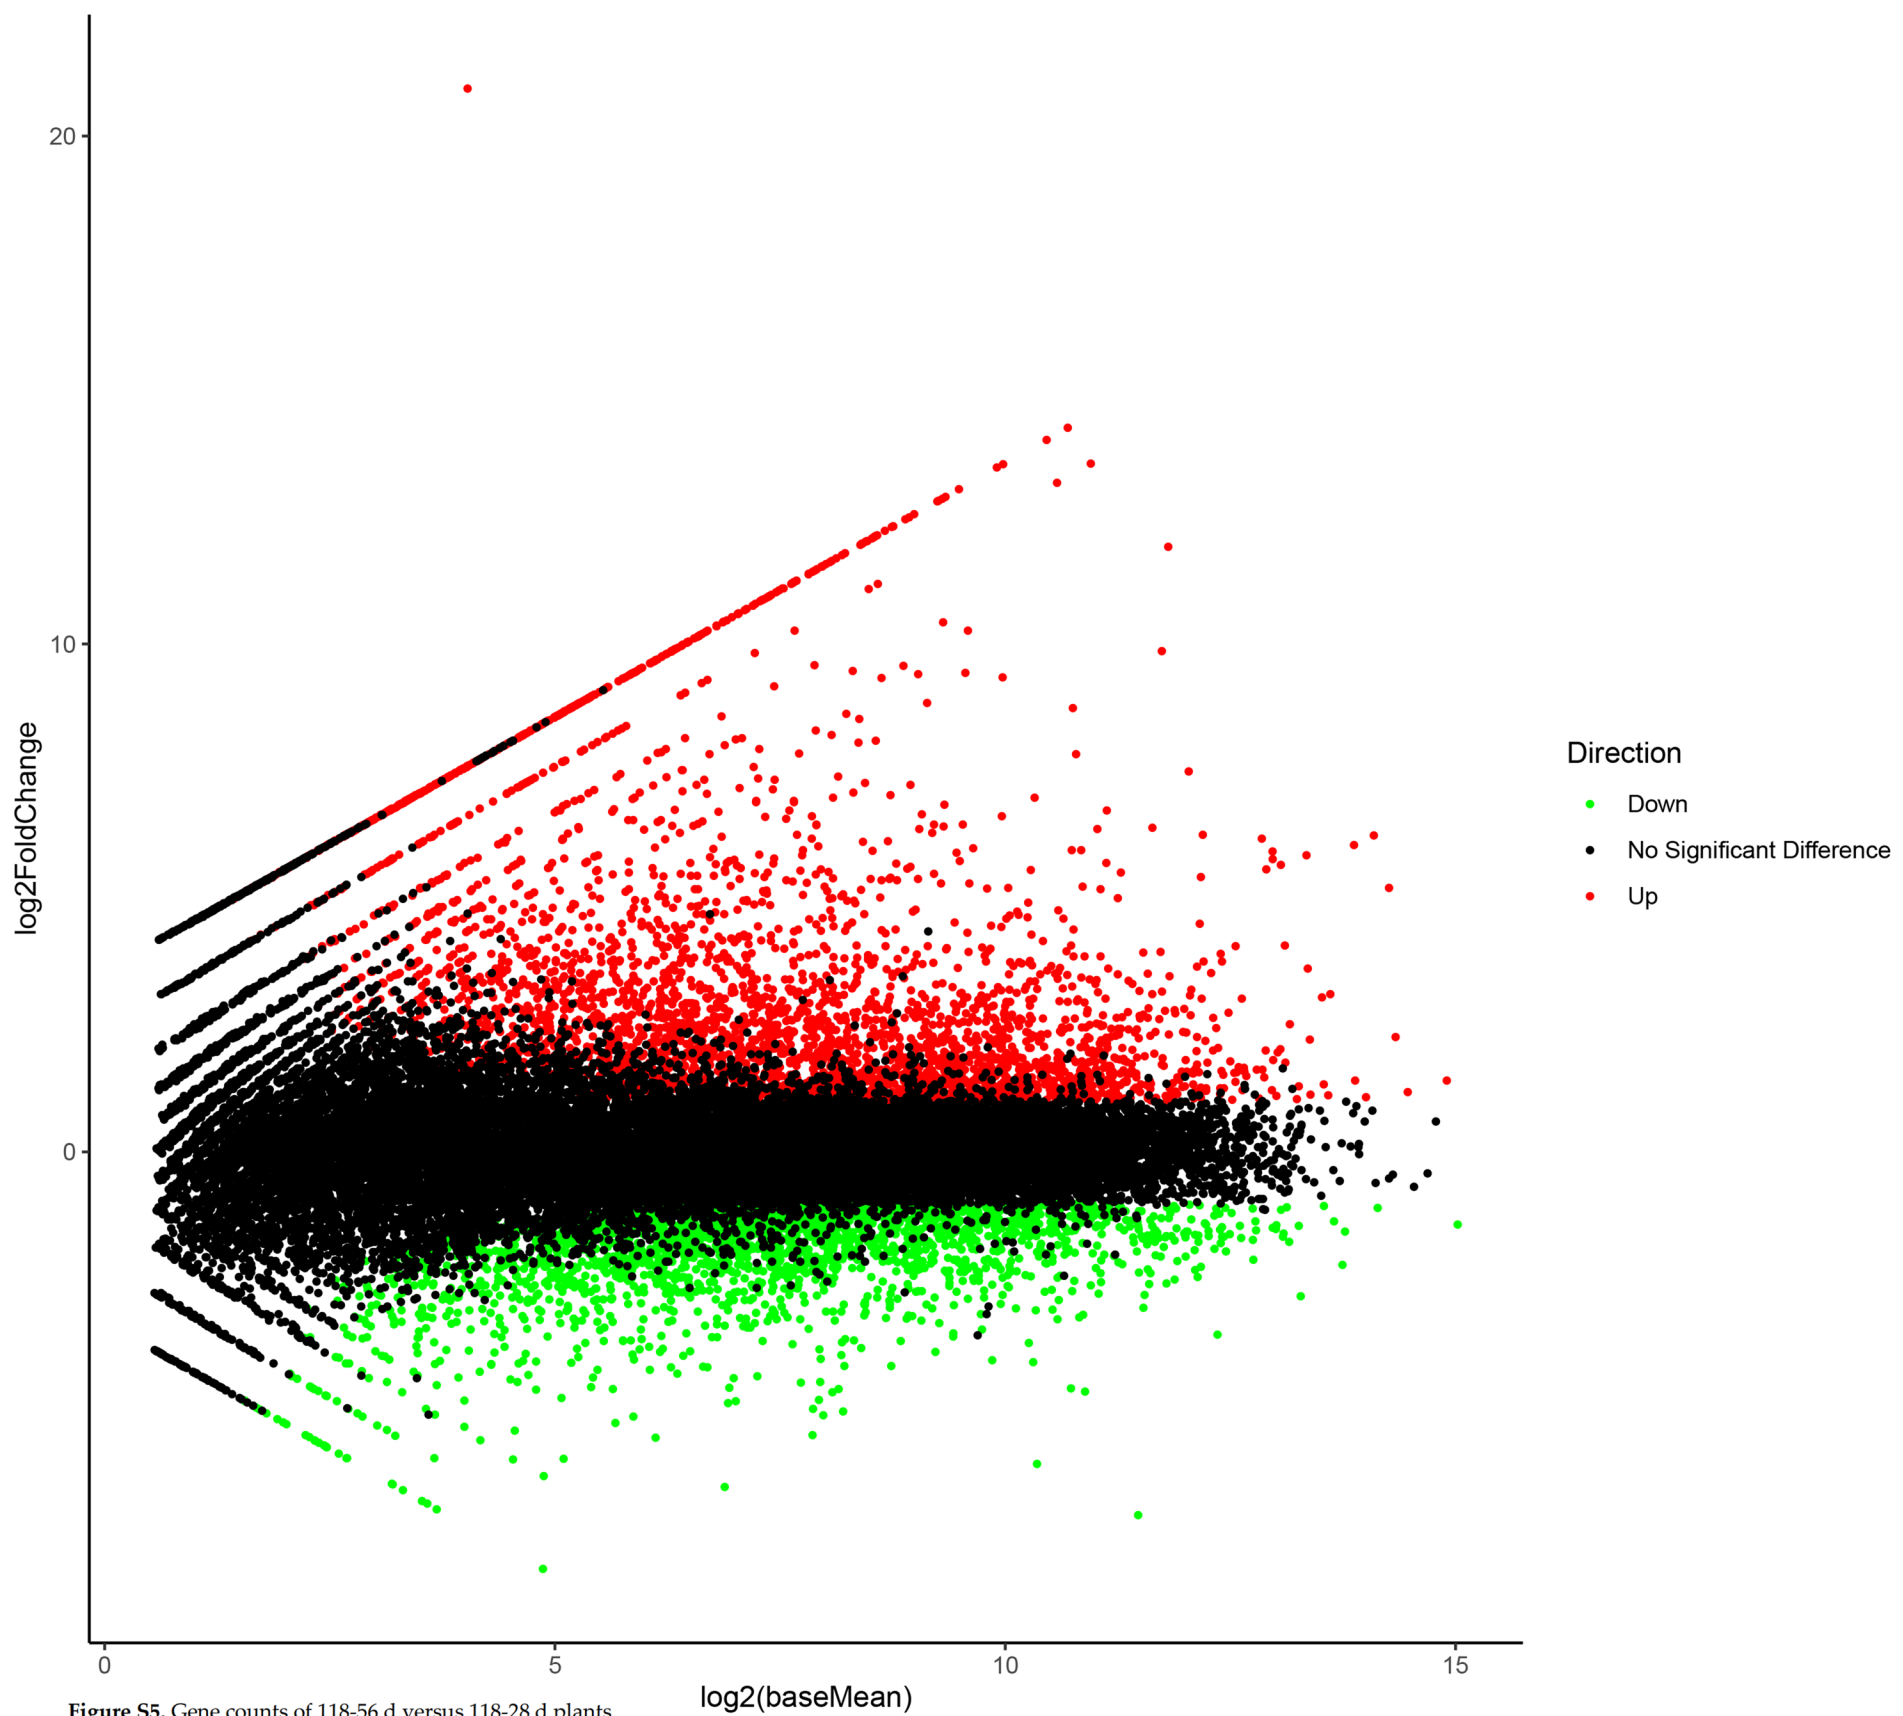

Figure S5. Gene counts of 118-56 d versus 118-28 d plants.

Supplement: s1 [file s1]

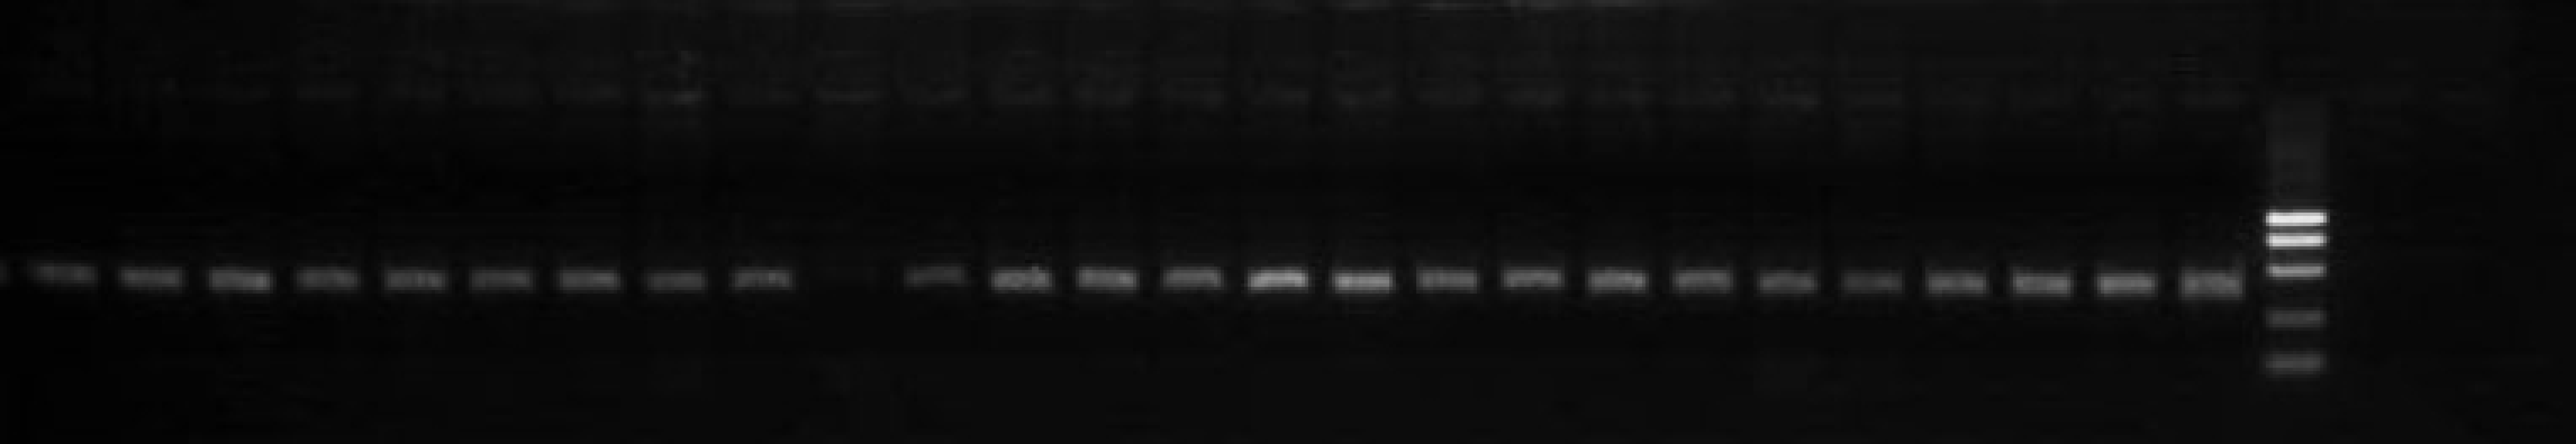

**Figure S20.** PCR and electrophoresis results

Supplement: s1 [file s1]

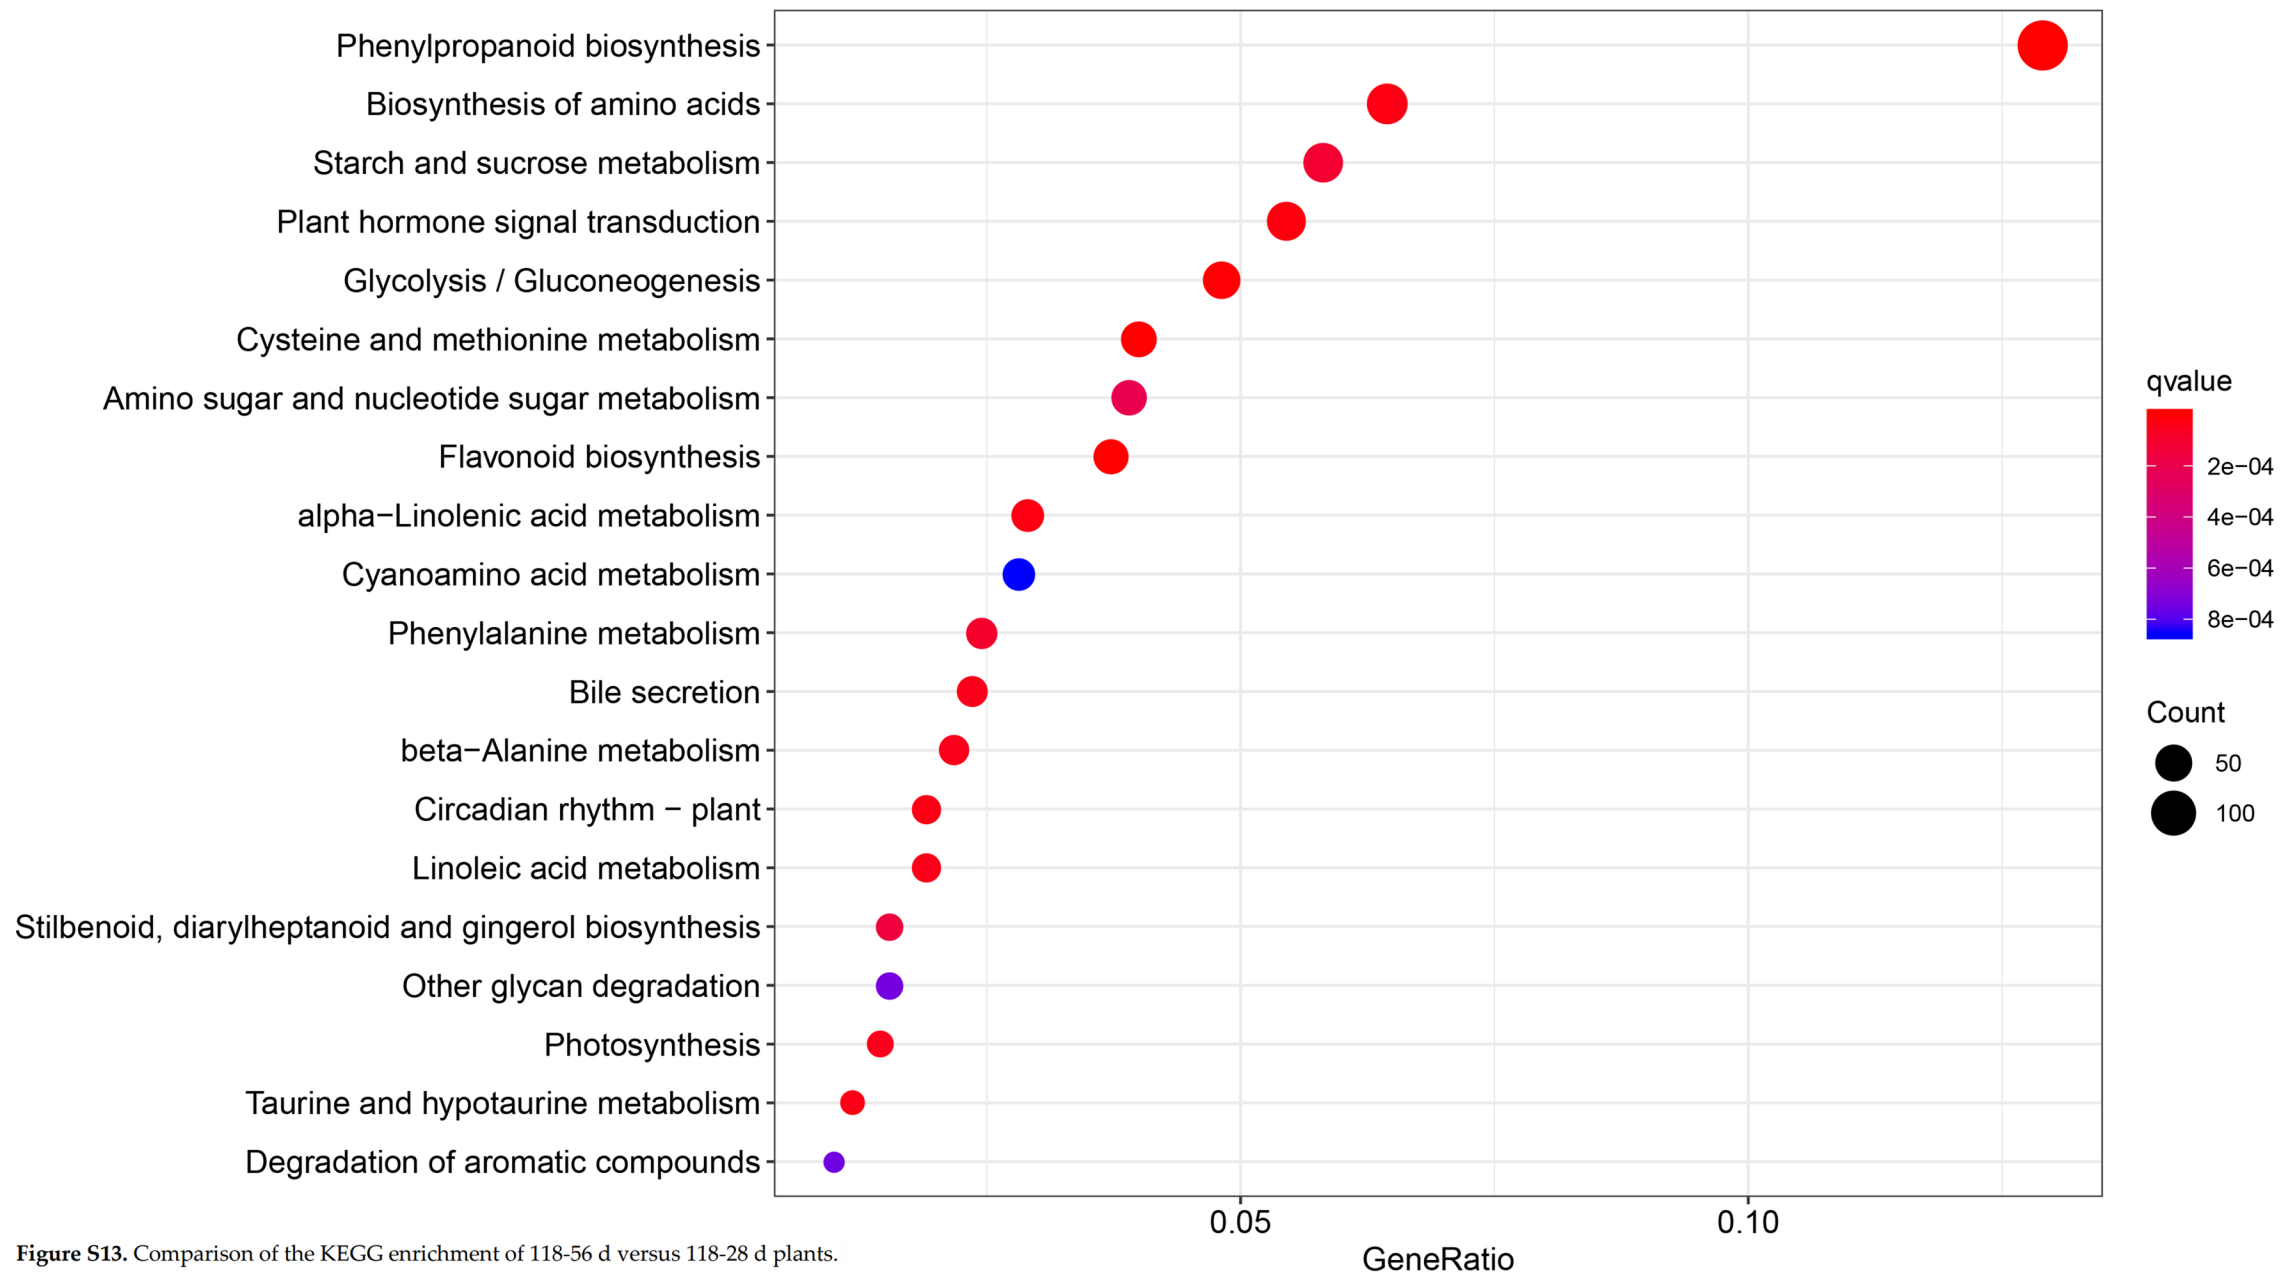

Supplement: s1 [file s1]

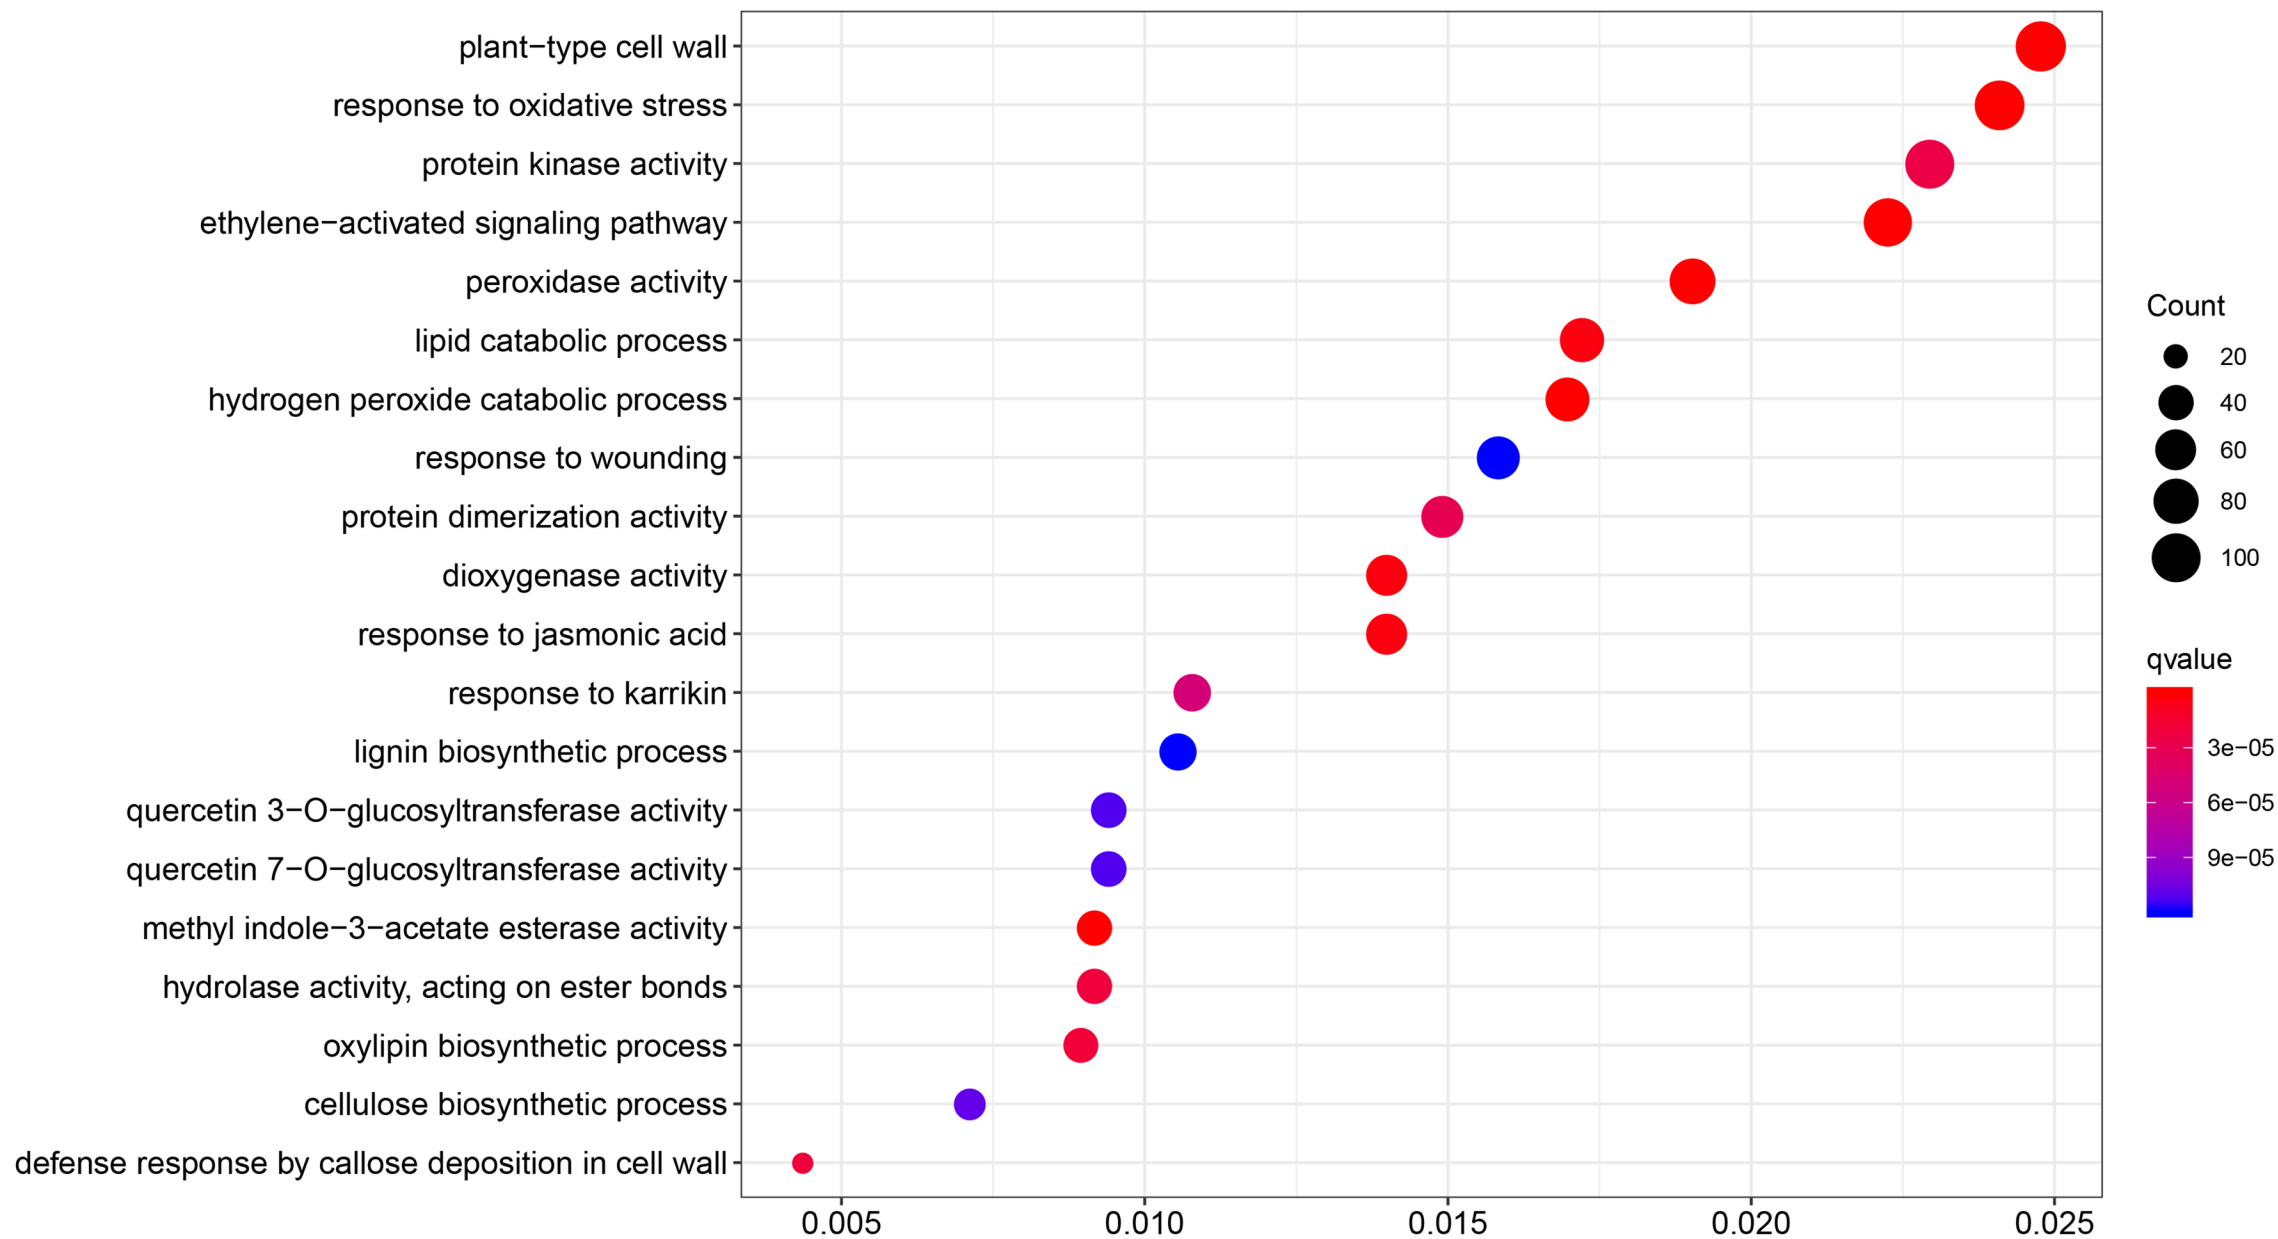

**Figure S9.** Comparison of the GO enrichment of 118-56 d versus 118-28 d plants.

Supplement: s1 [file s1]

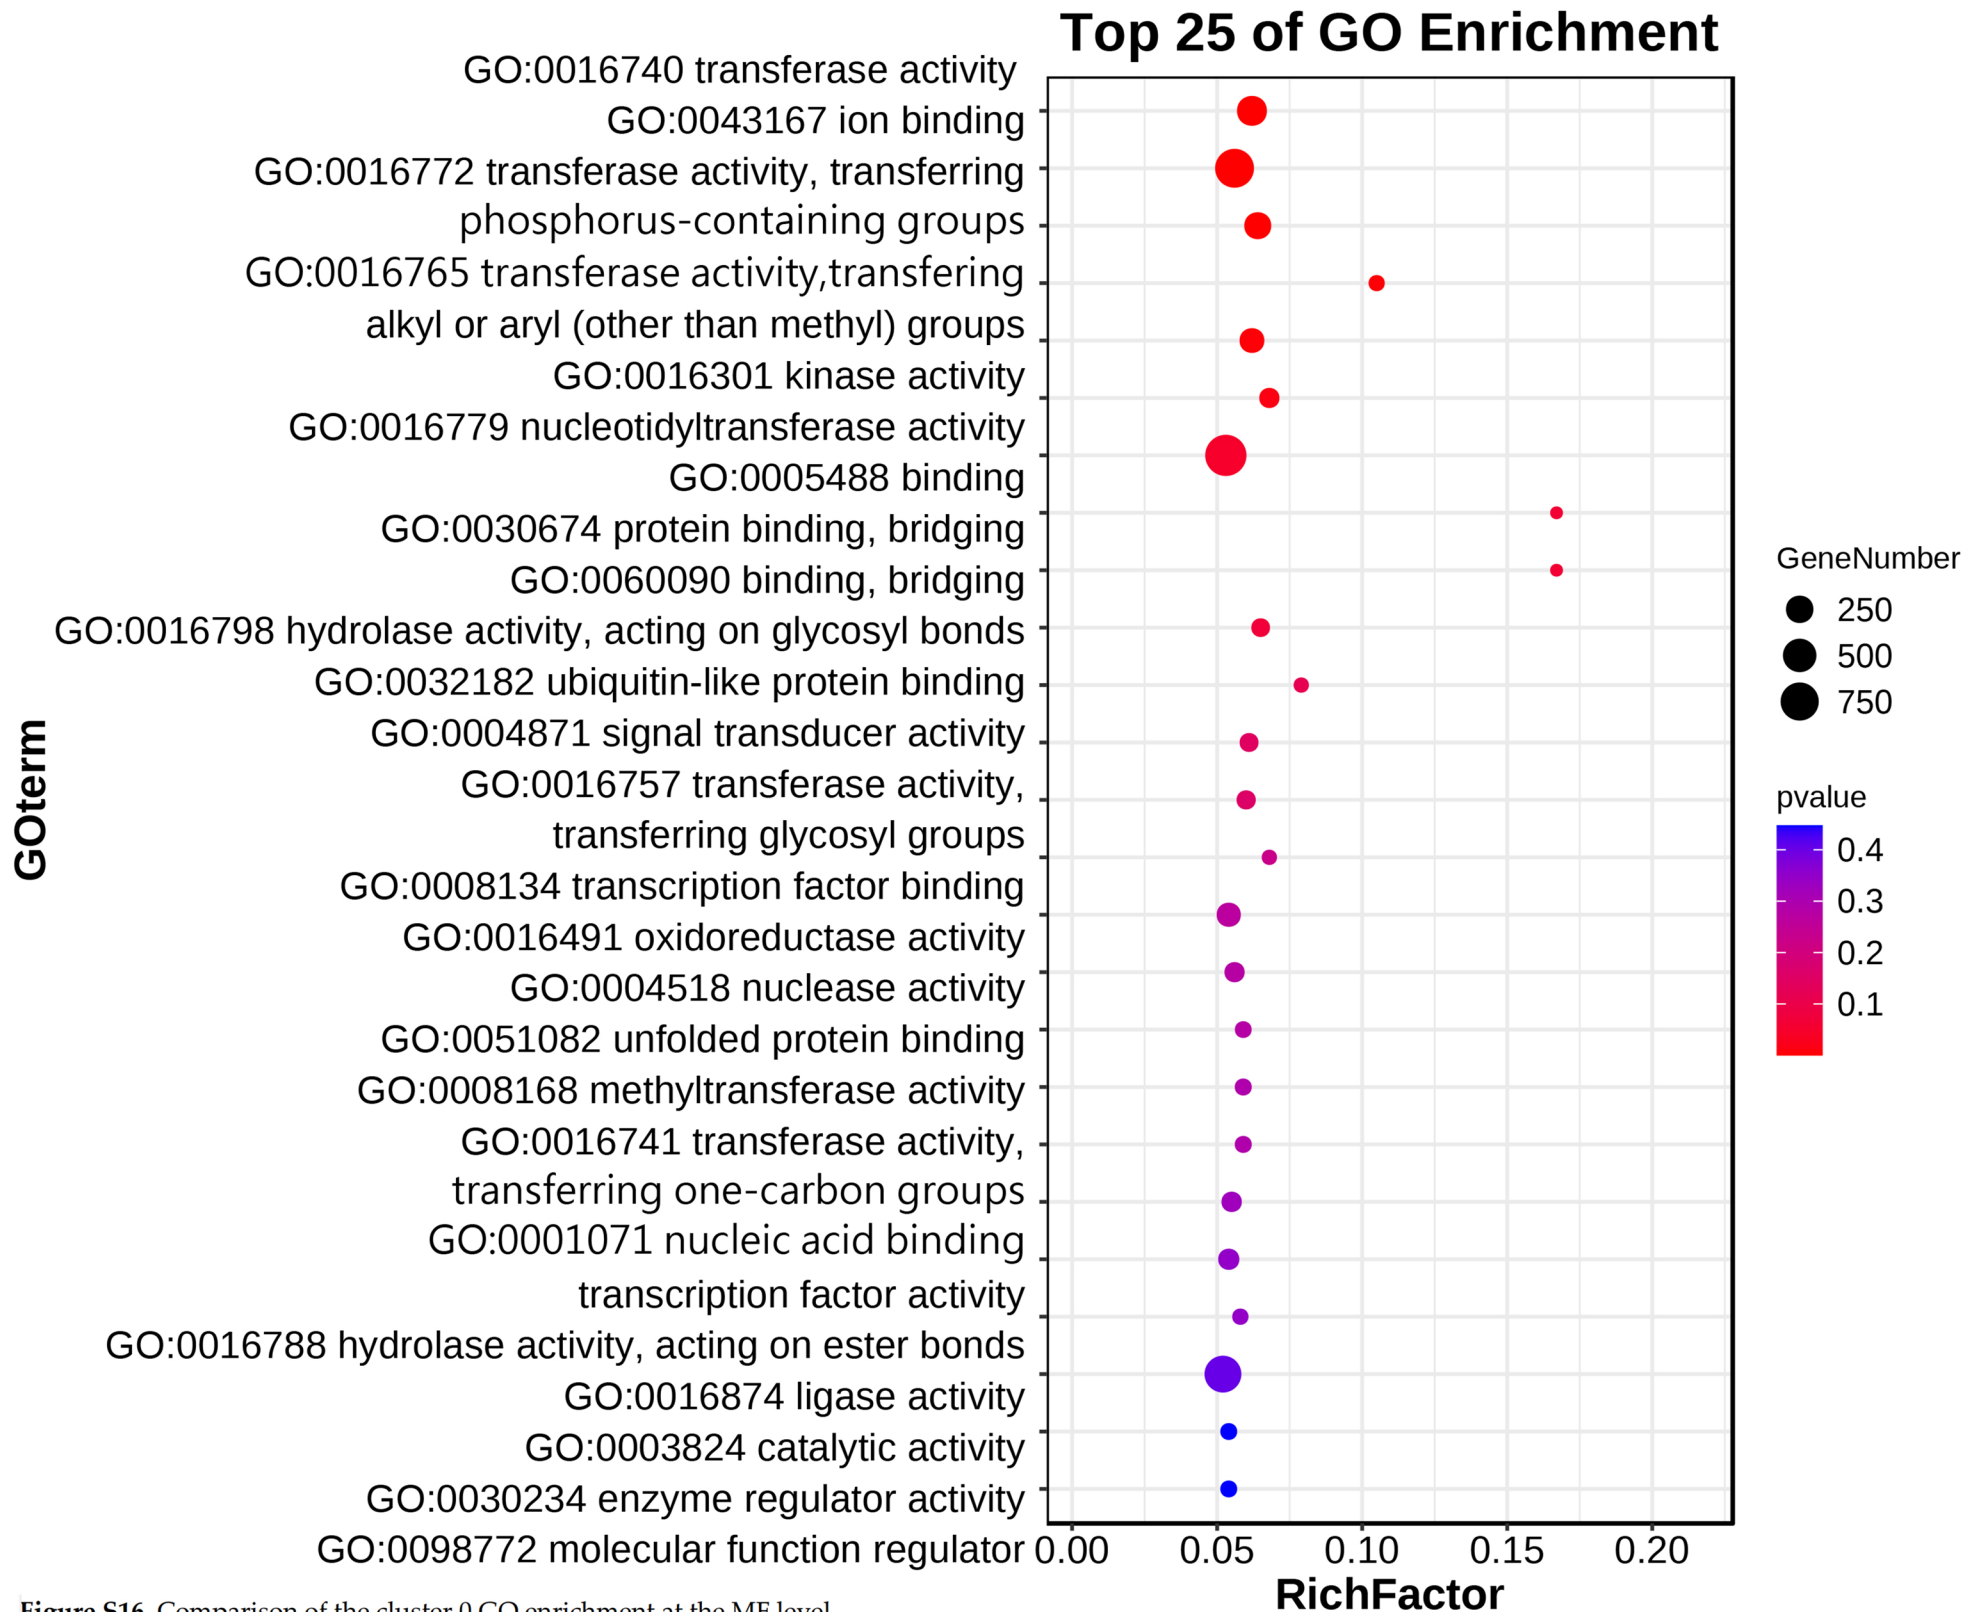

Figure S16. Comparison of the cluster 0 GO enrichment at the MF level.

Supplement: s1 [file s1]

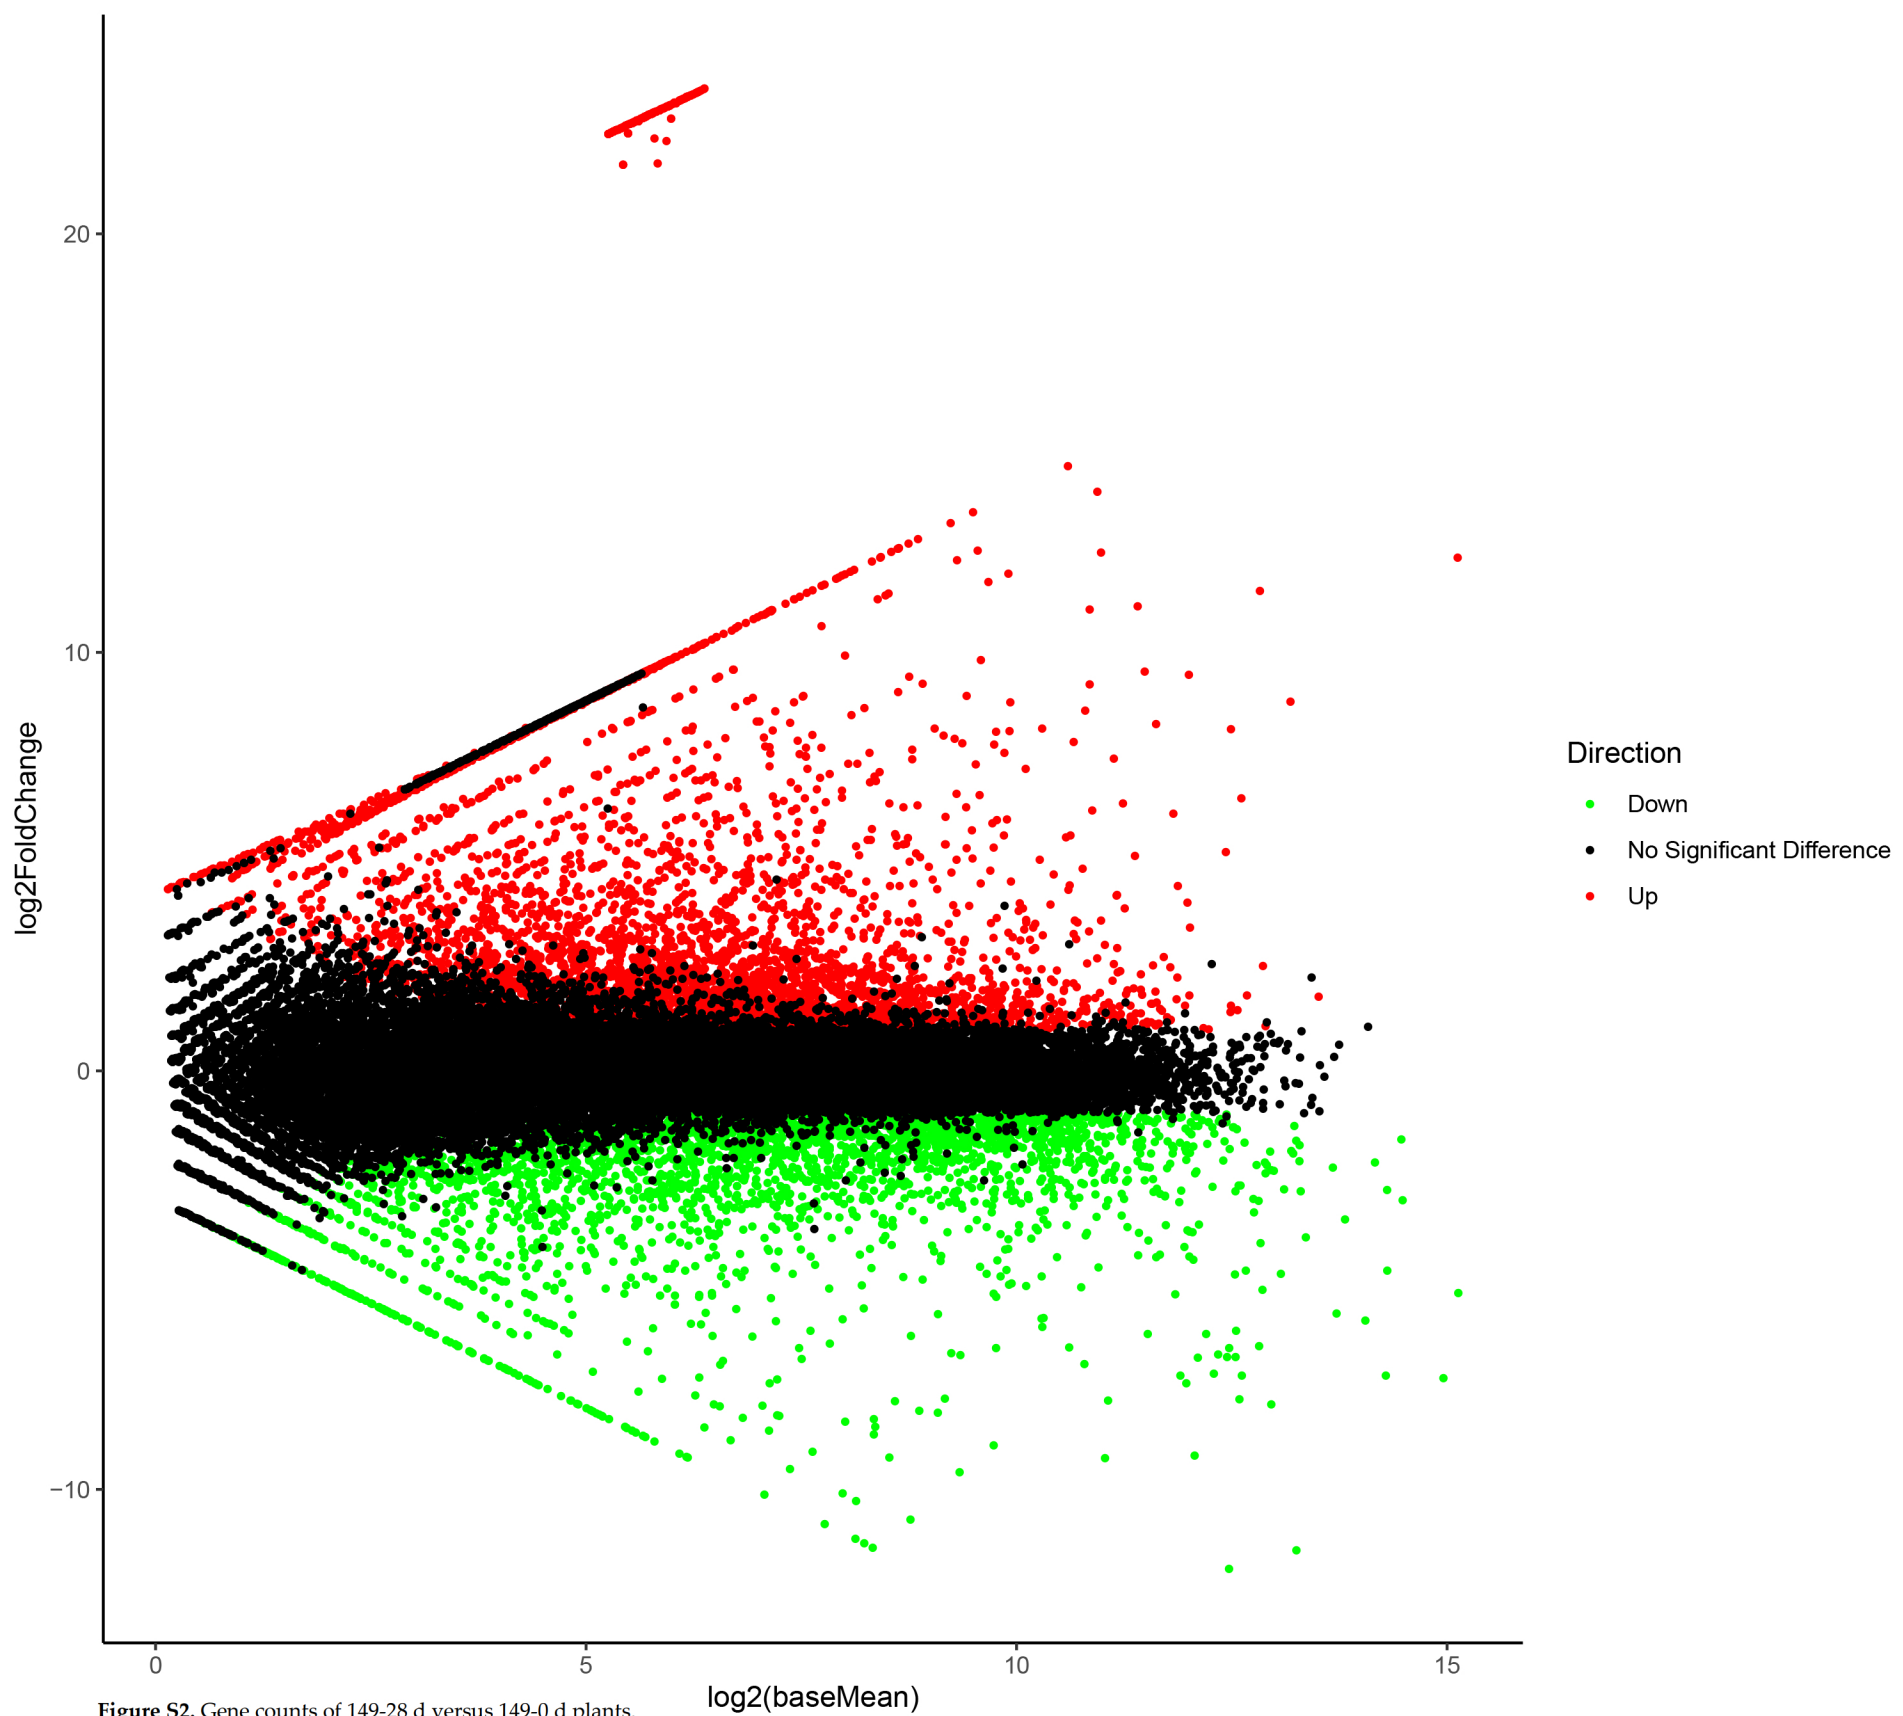

Supplement: s1 [file s1]

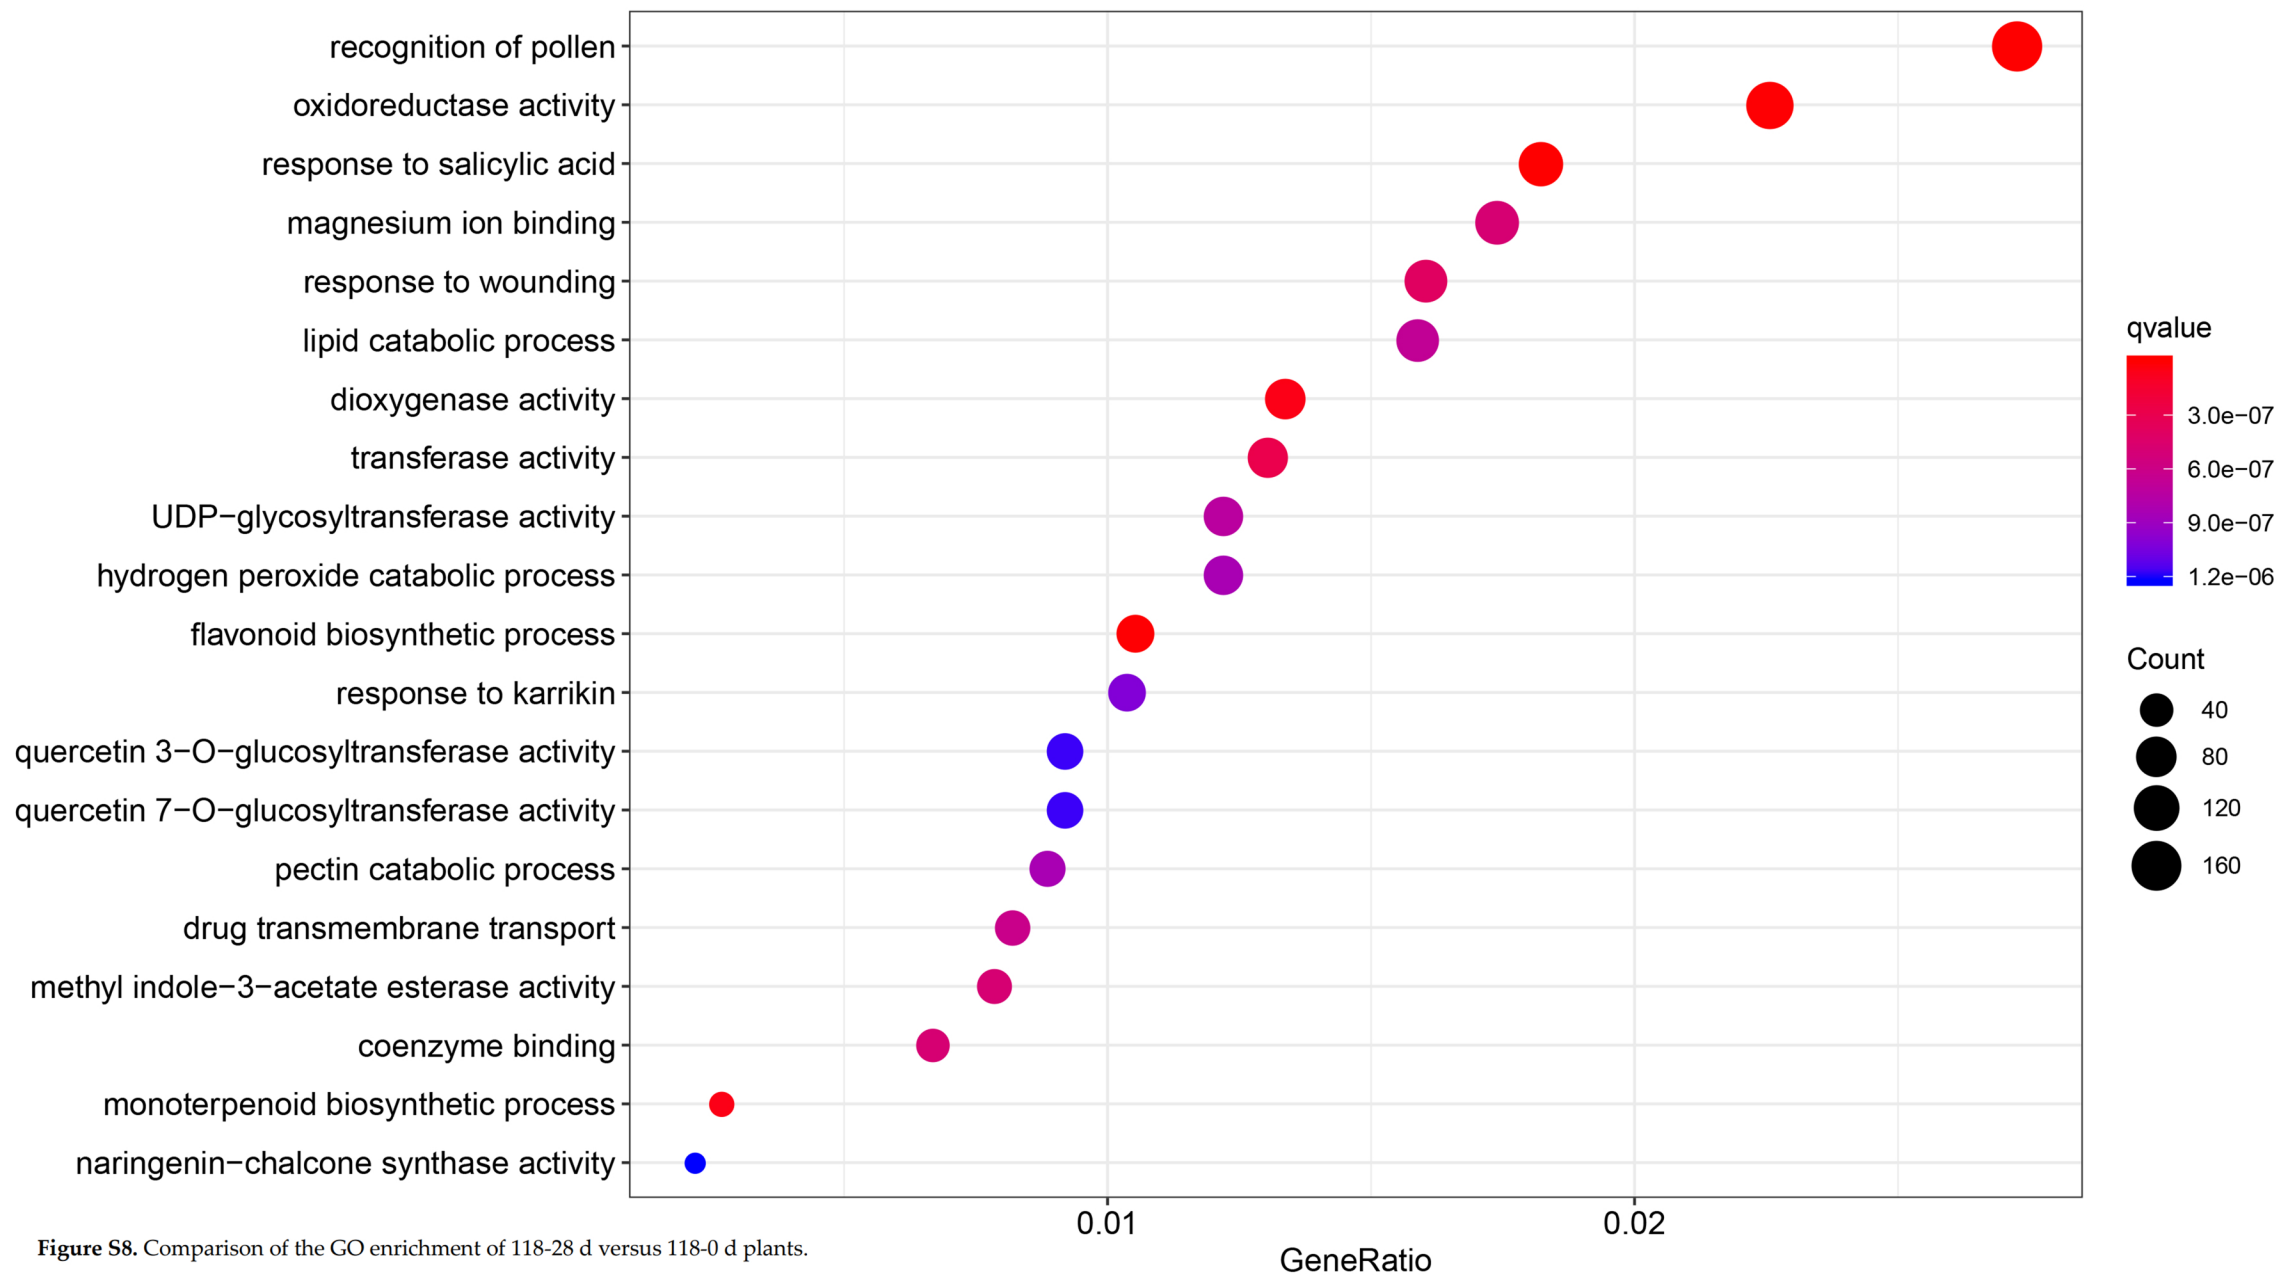

Supplement: s1 [file s1]

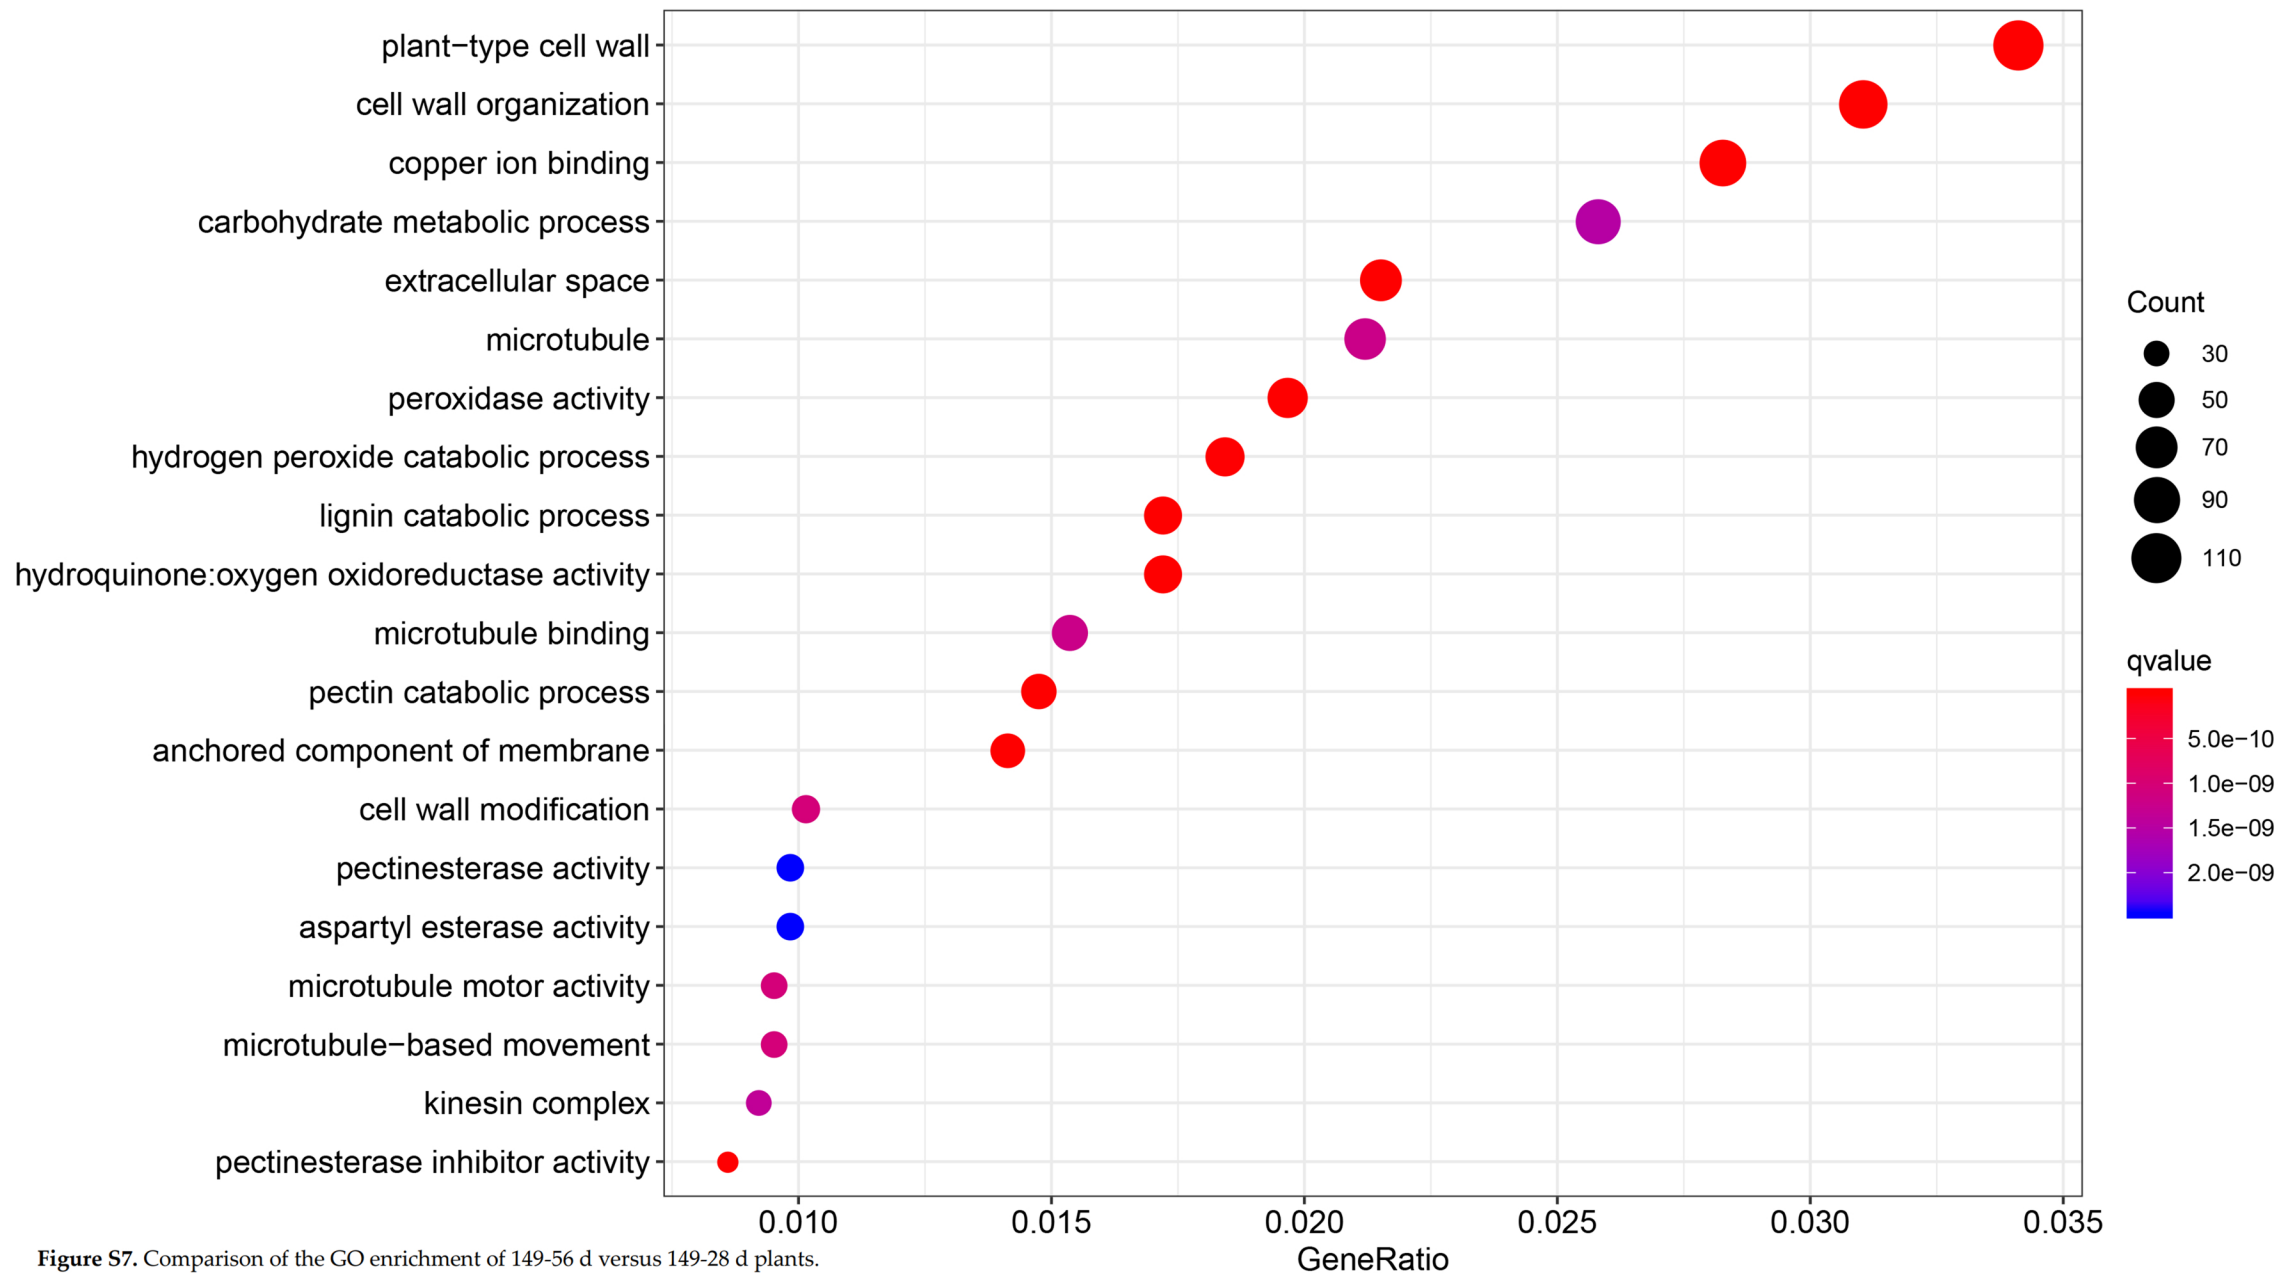

Supplement: s1 [file s1]

# Top 25 of GO Enrichment

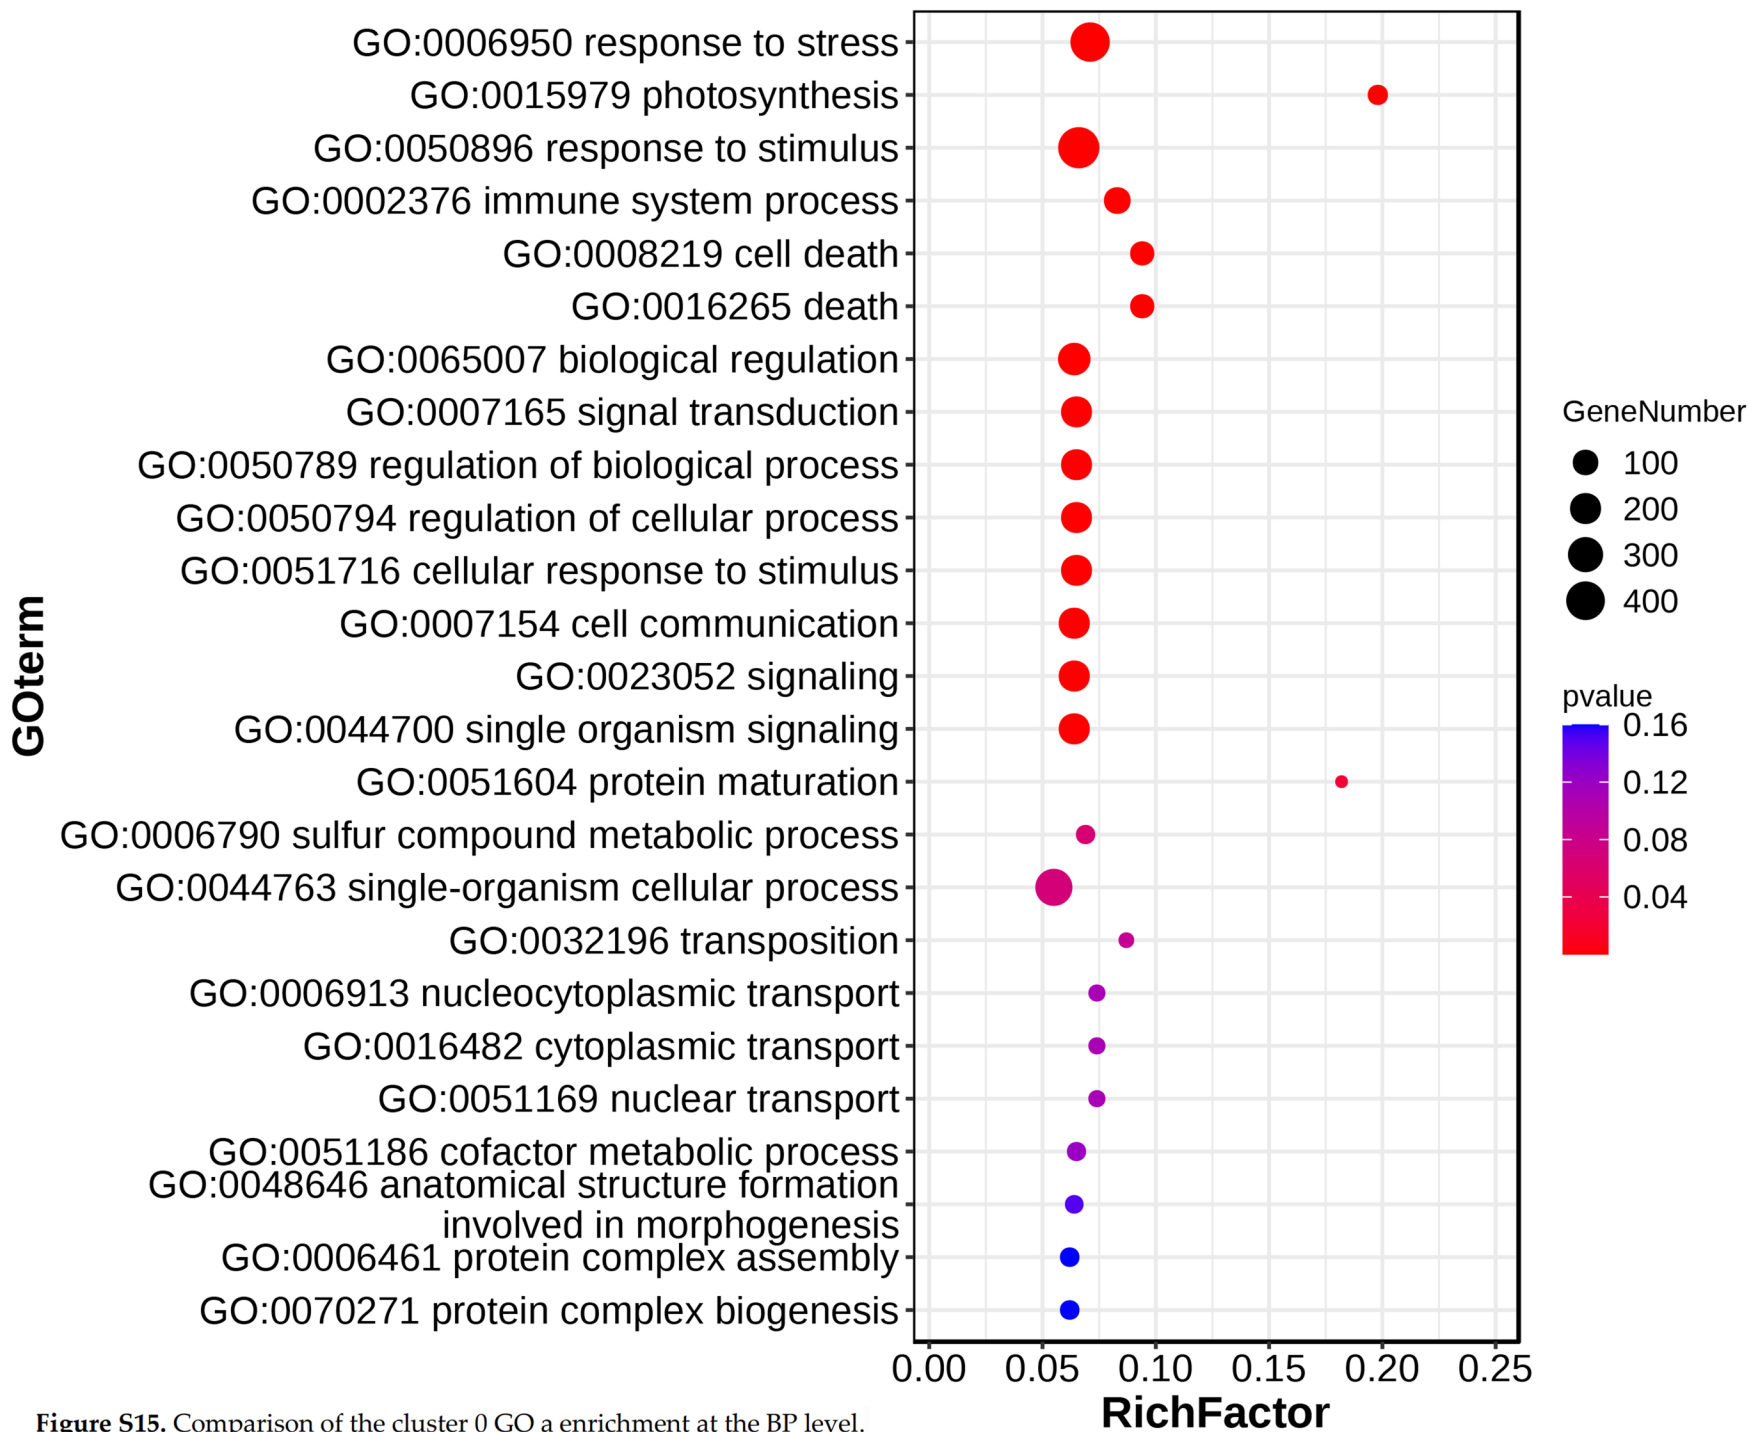

**Figure S15.** Comparison of the cluster 0 GO a enrichment at the BP level.

Supplement: s1 [file s1]

# Top 25 of GO Enrichment

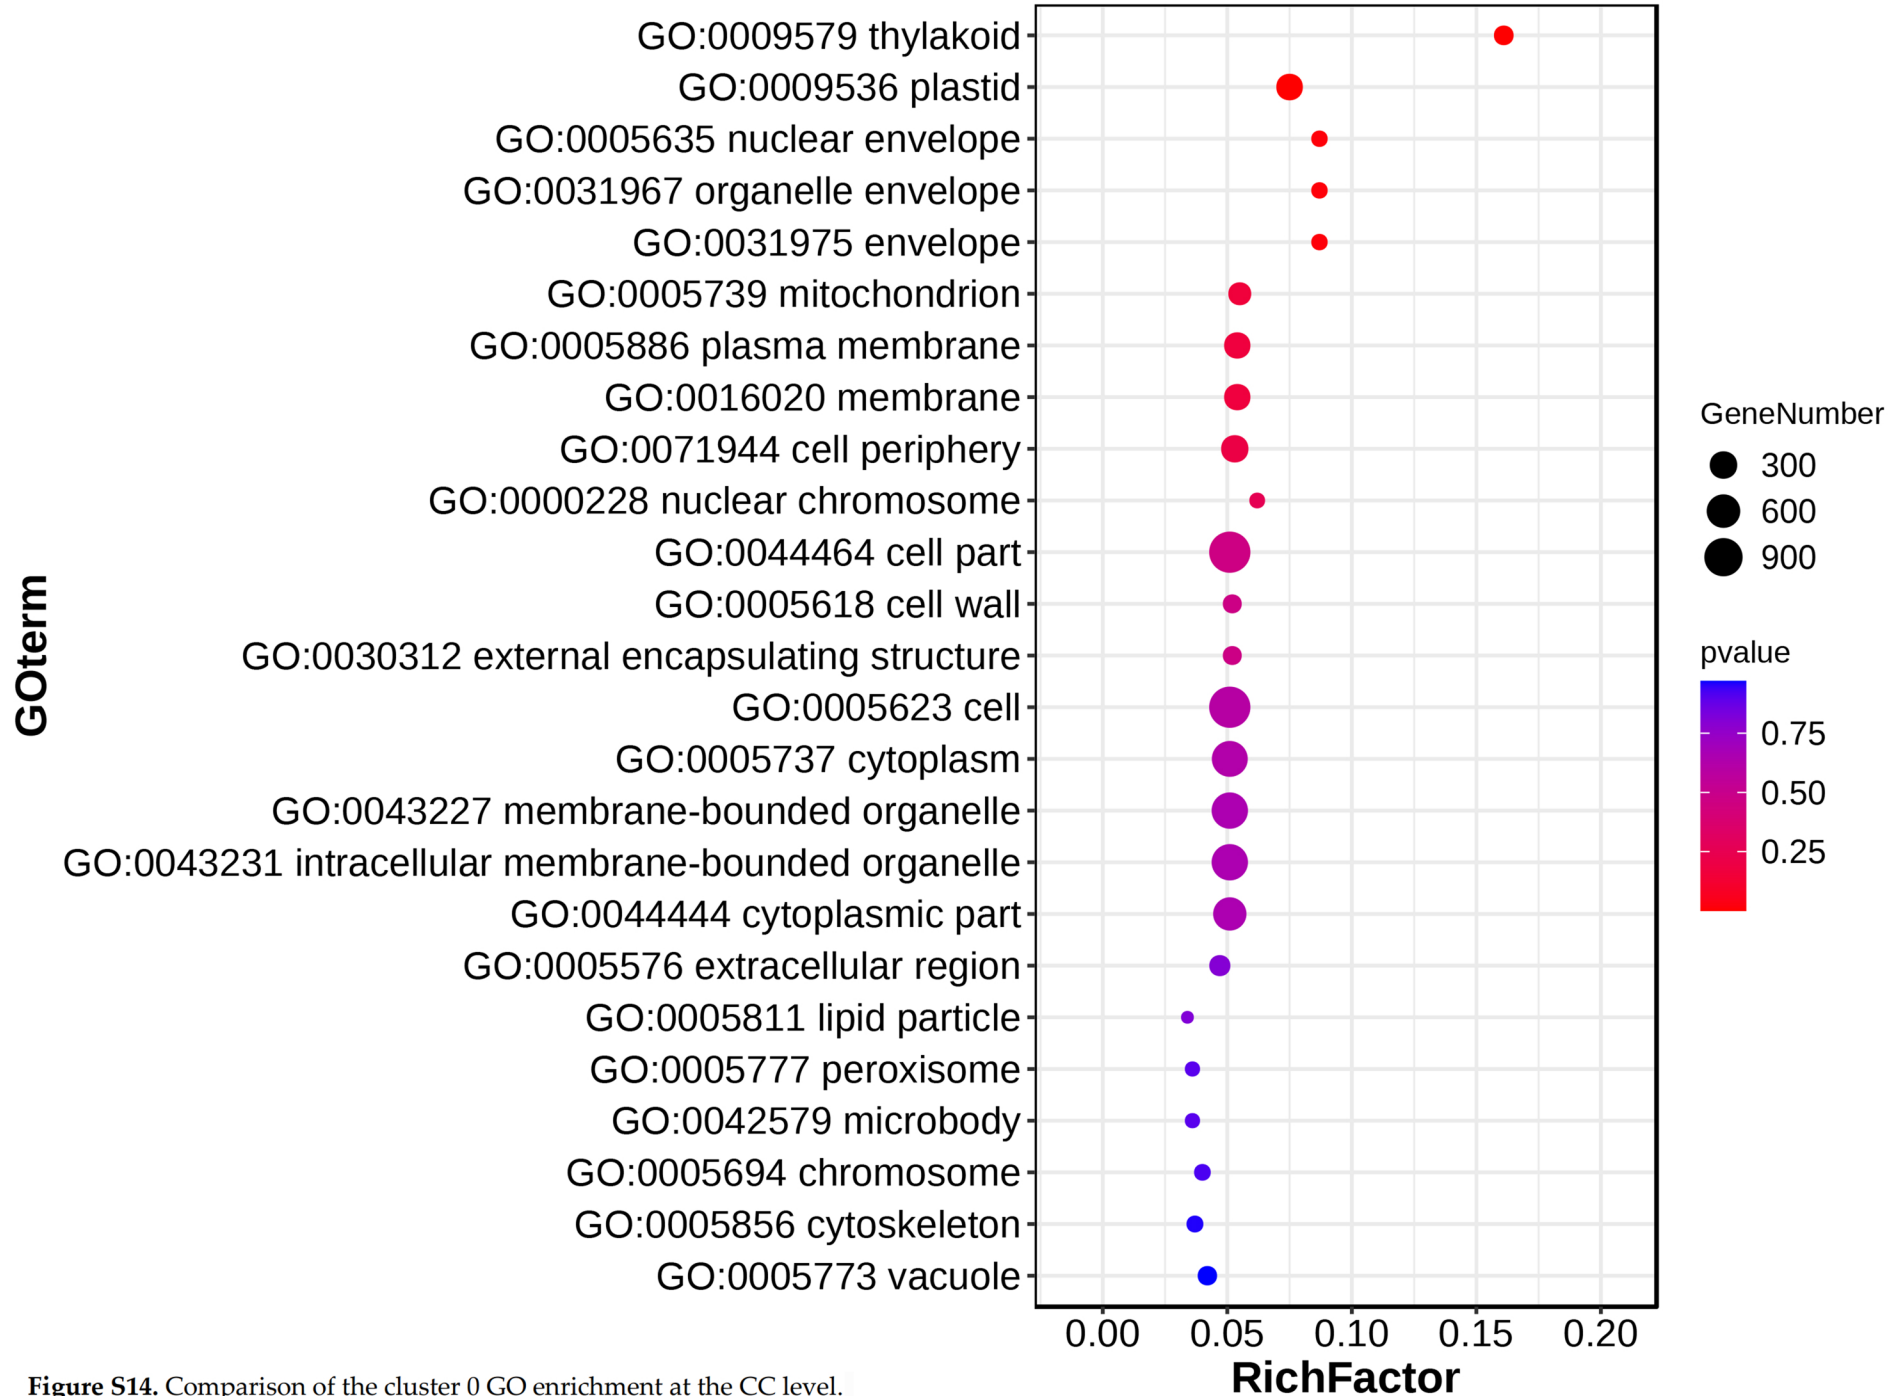

**Figure S14.** Comparison of the cluster 0 GO enrichment at the CC level.

Supplement: s1 [file s1]

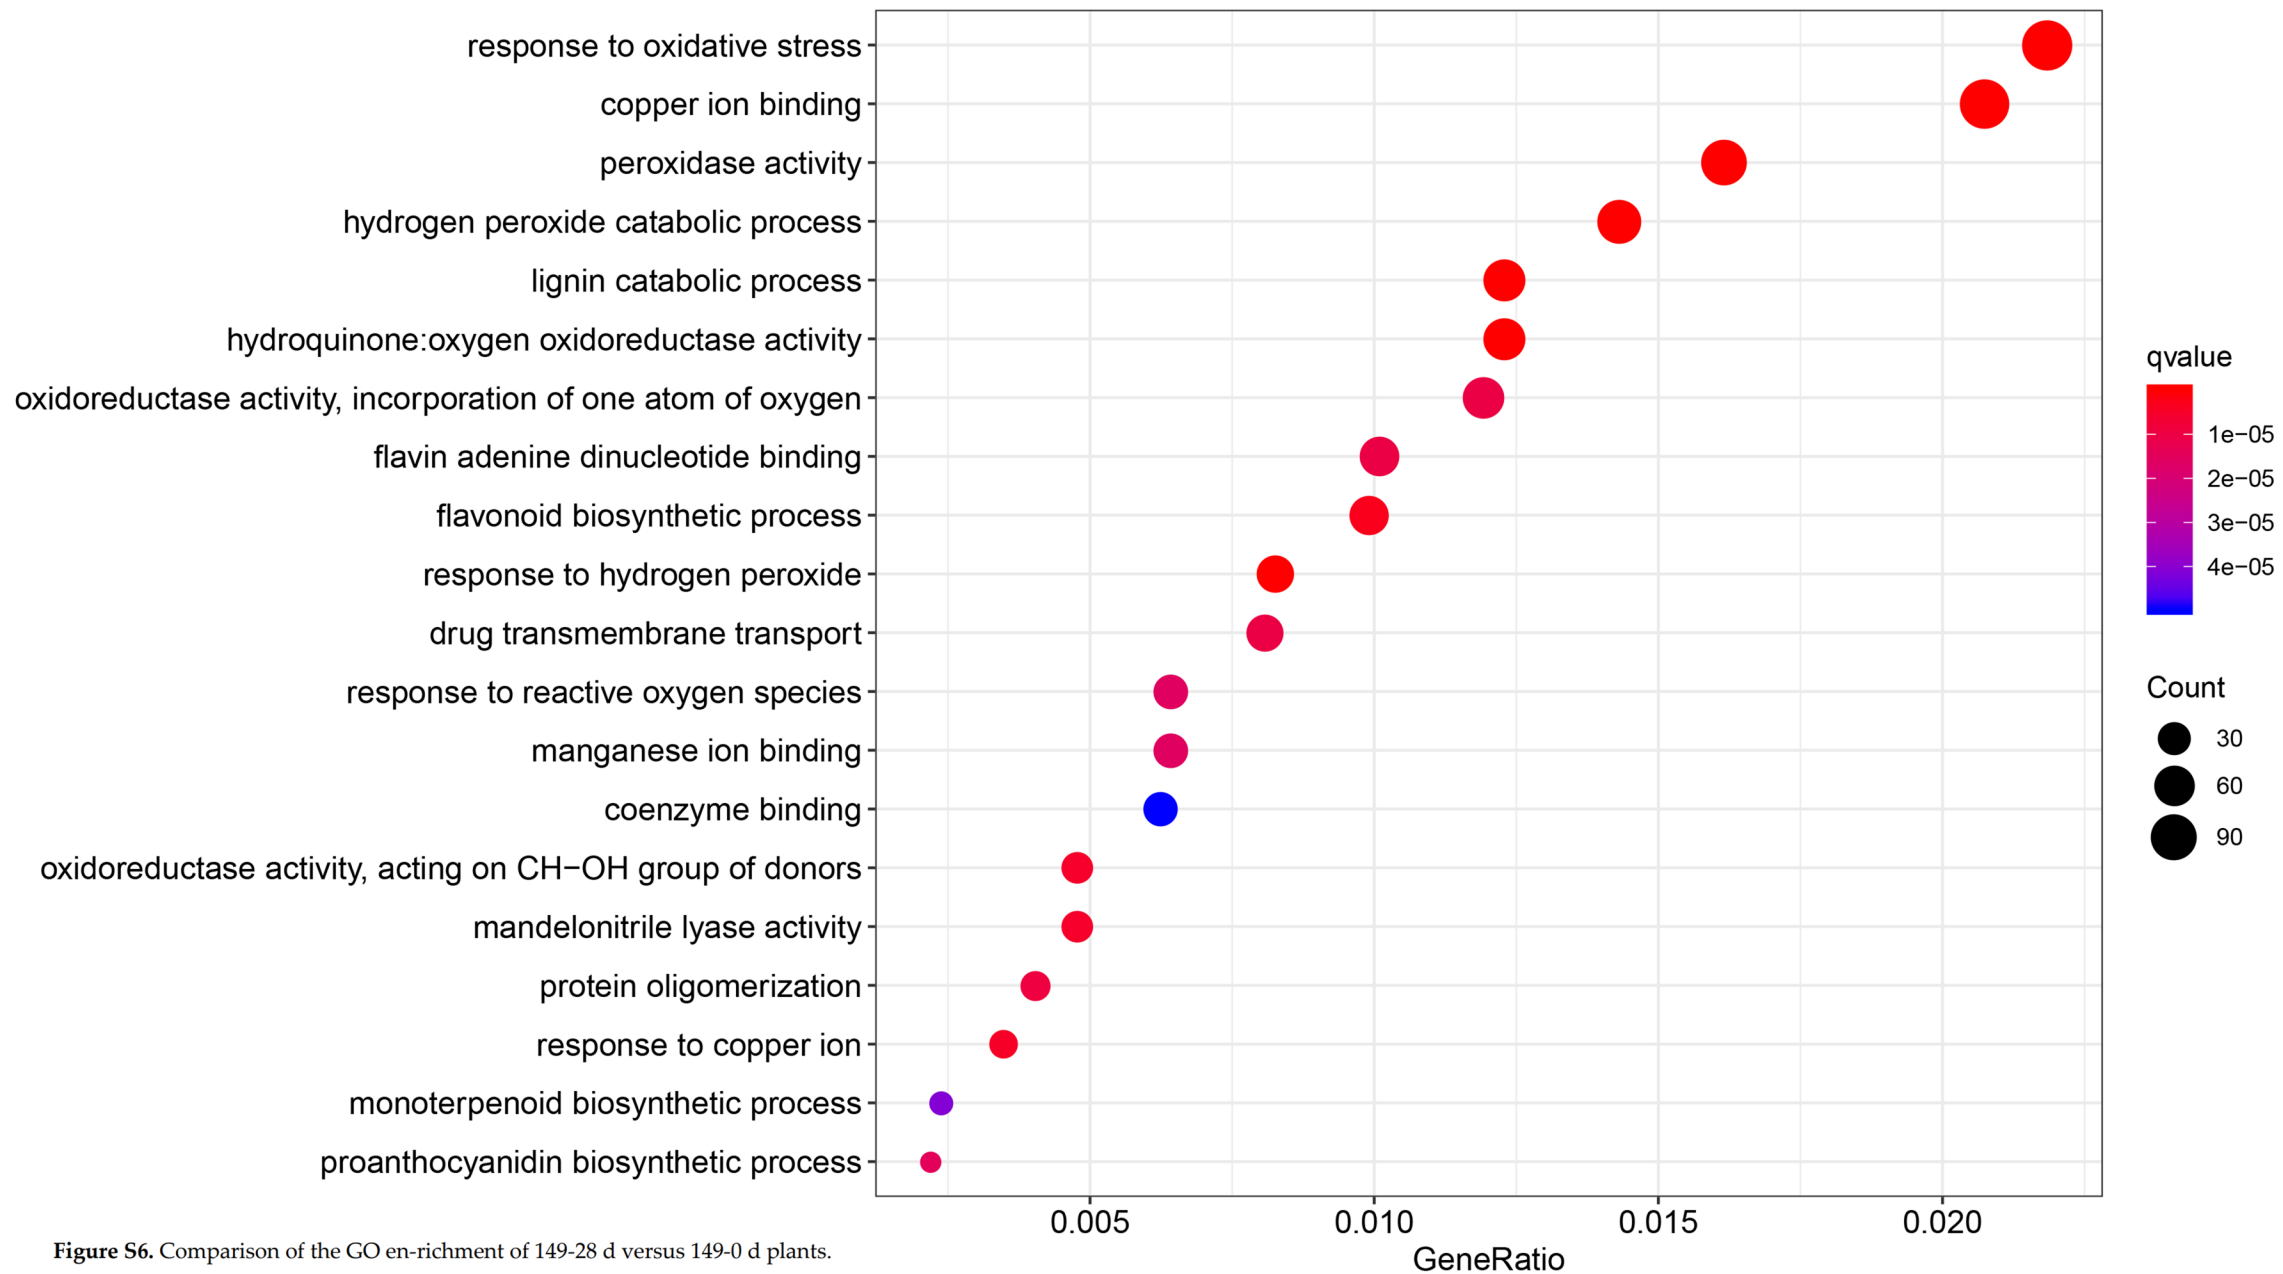

Supplement: s1 [file s1]

## Top 25 of GO Enrichment

GOterm

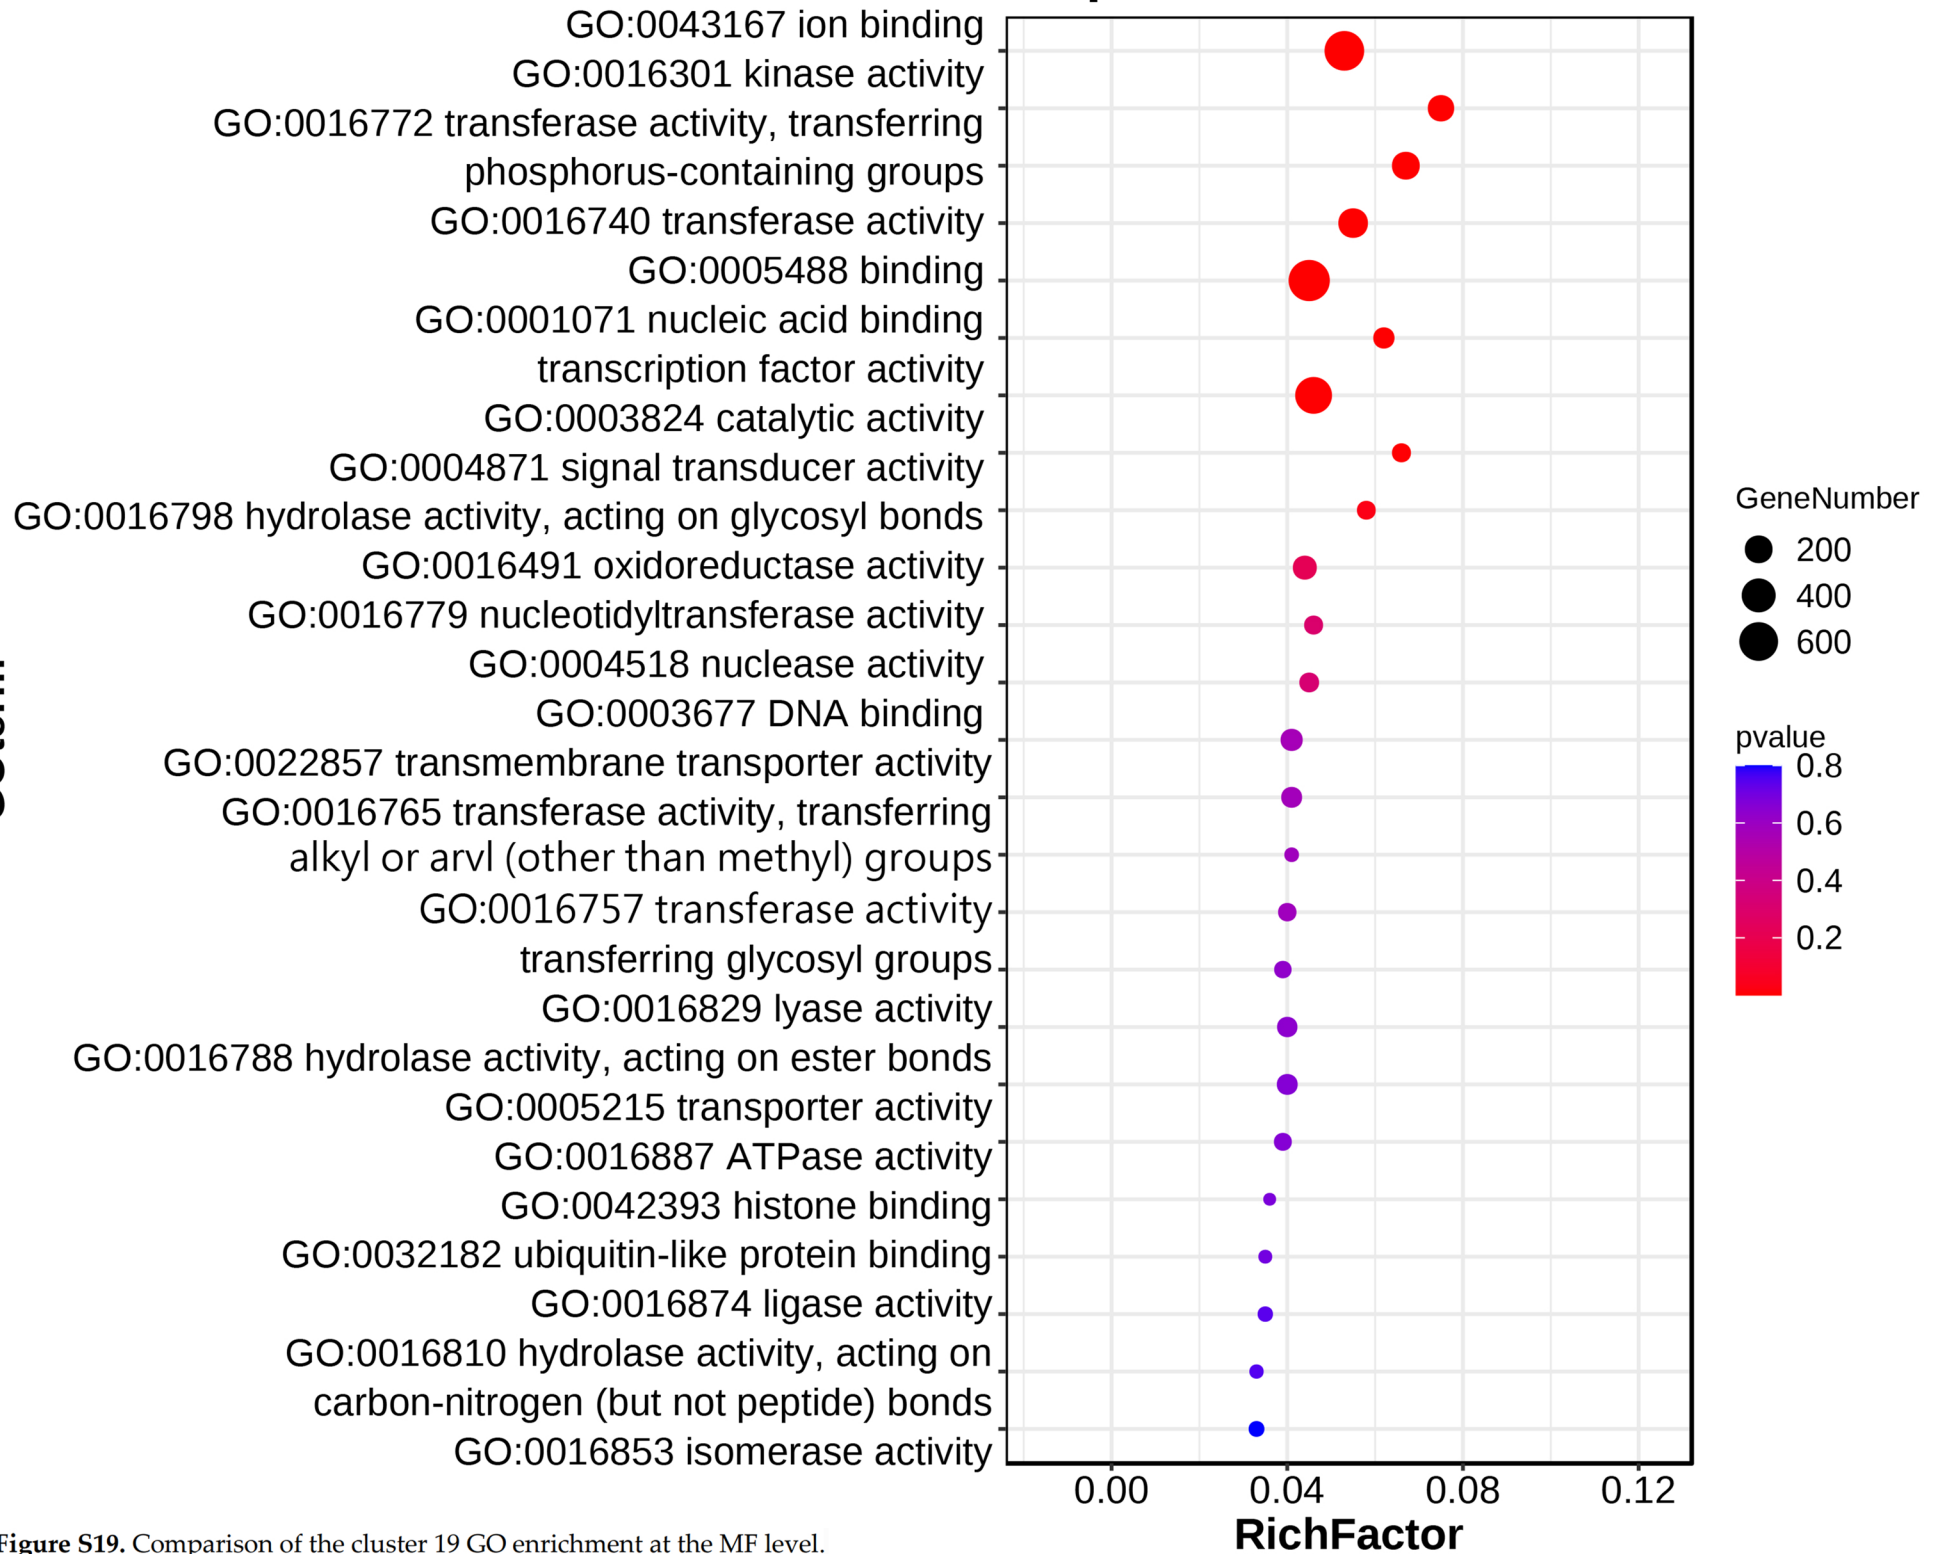

Figure S19. Comparison of the cluster 19 GO enrichment at the MF level.

Supplement: s1 [file s1]

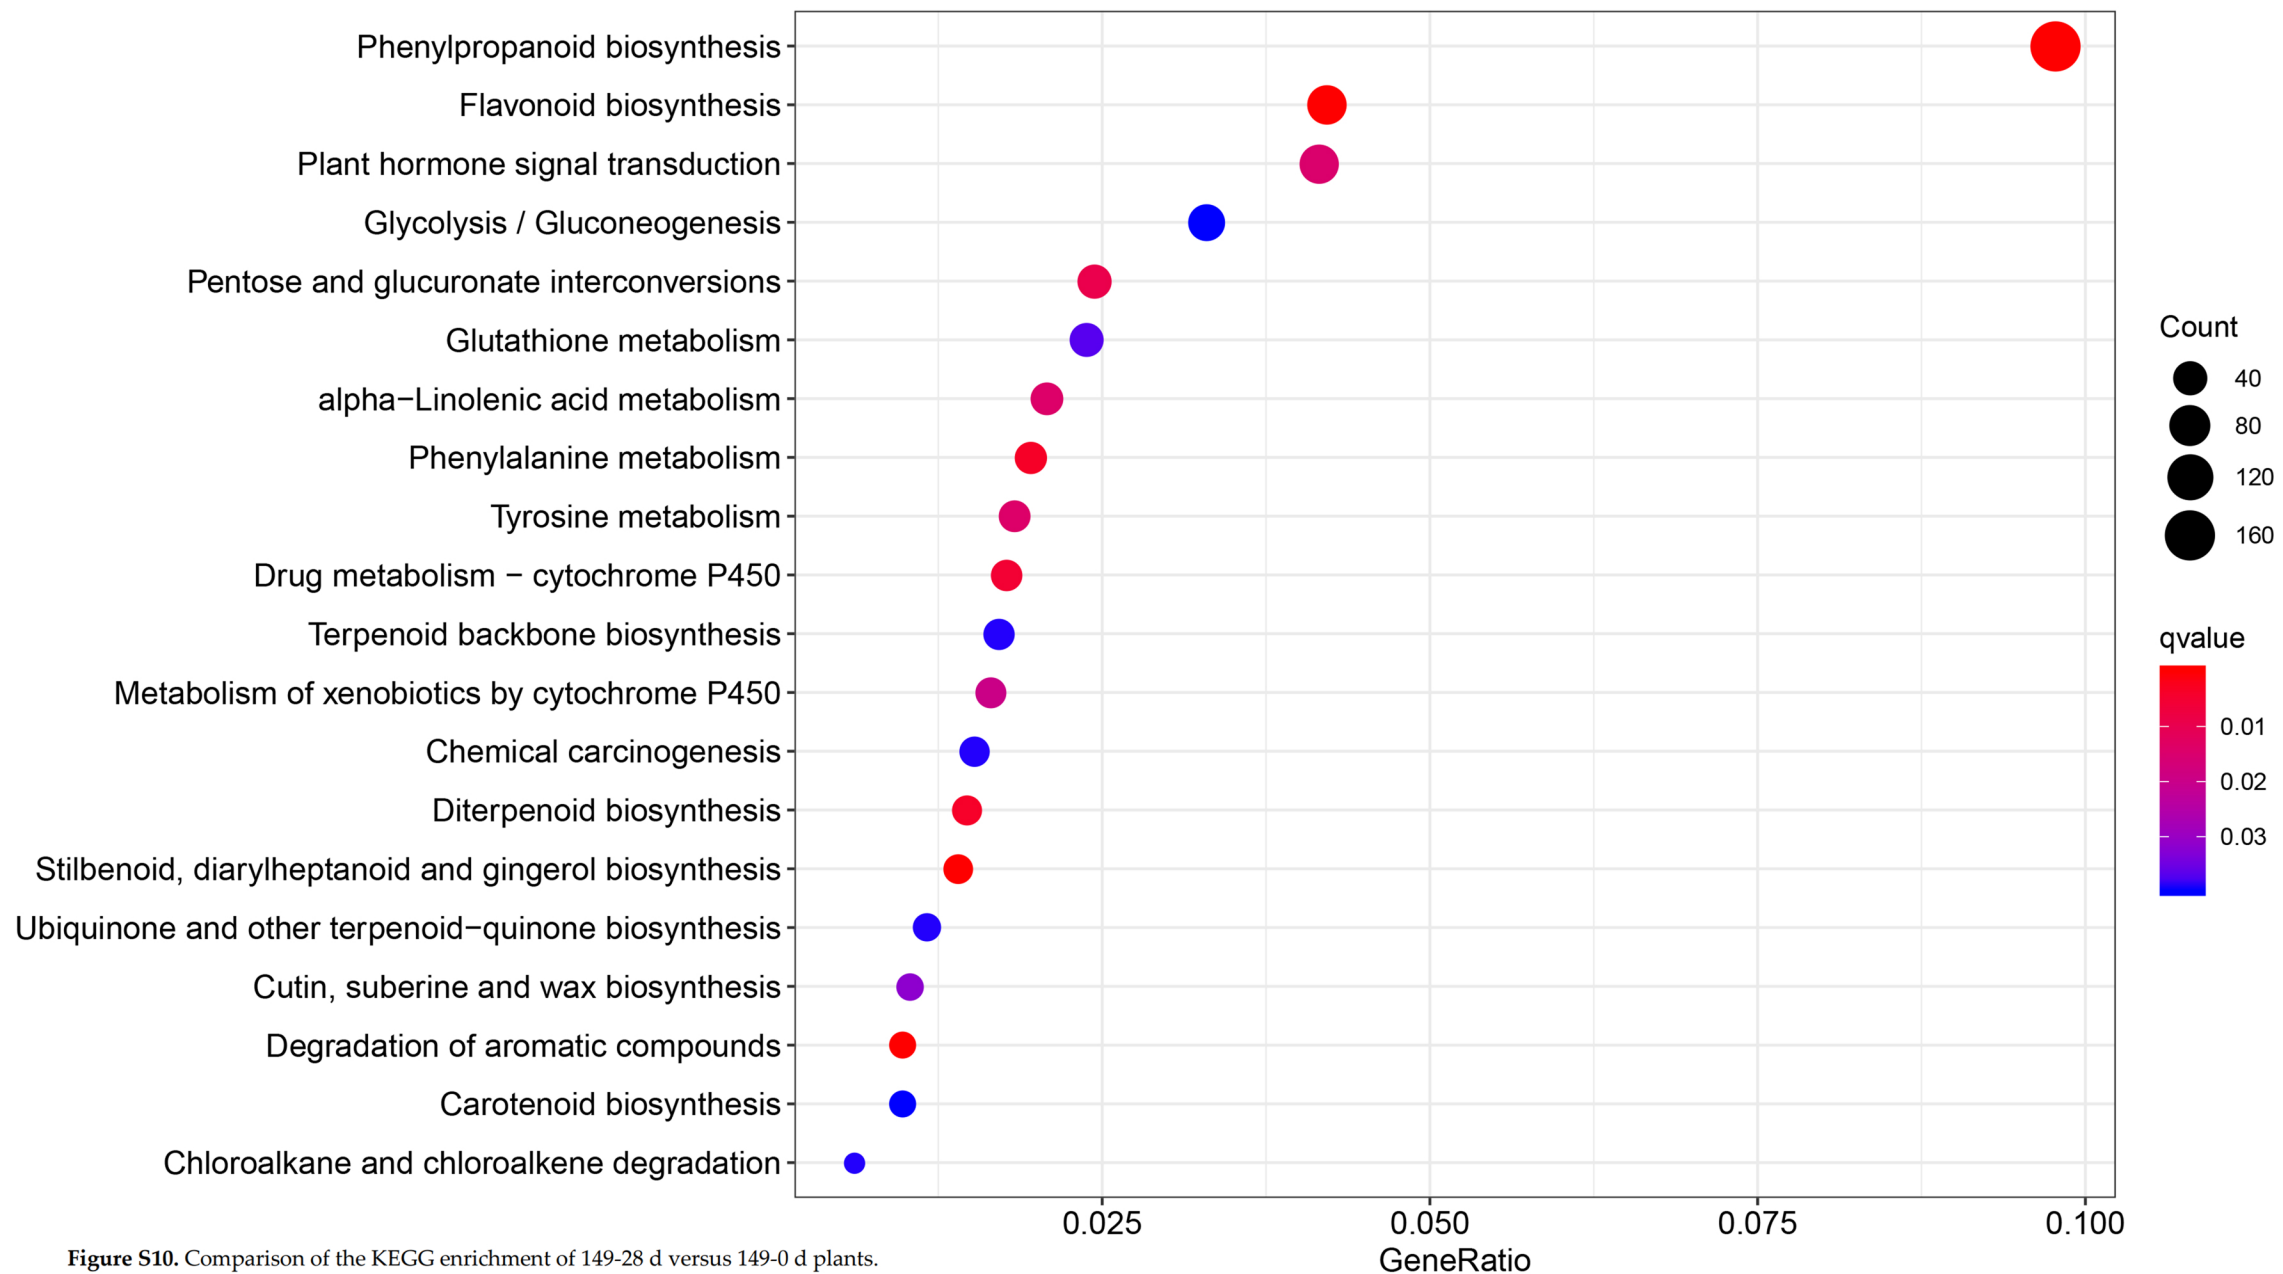

Supplement: s1 [file s1]

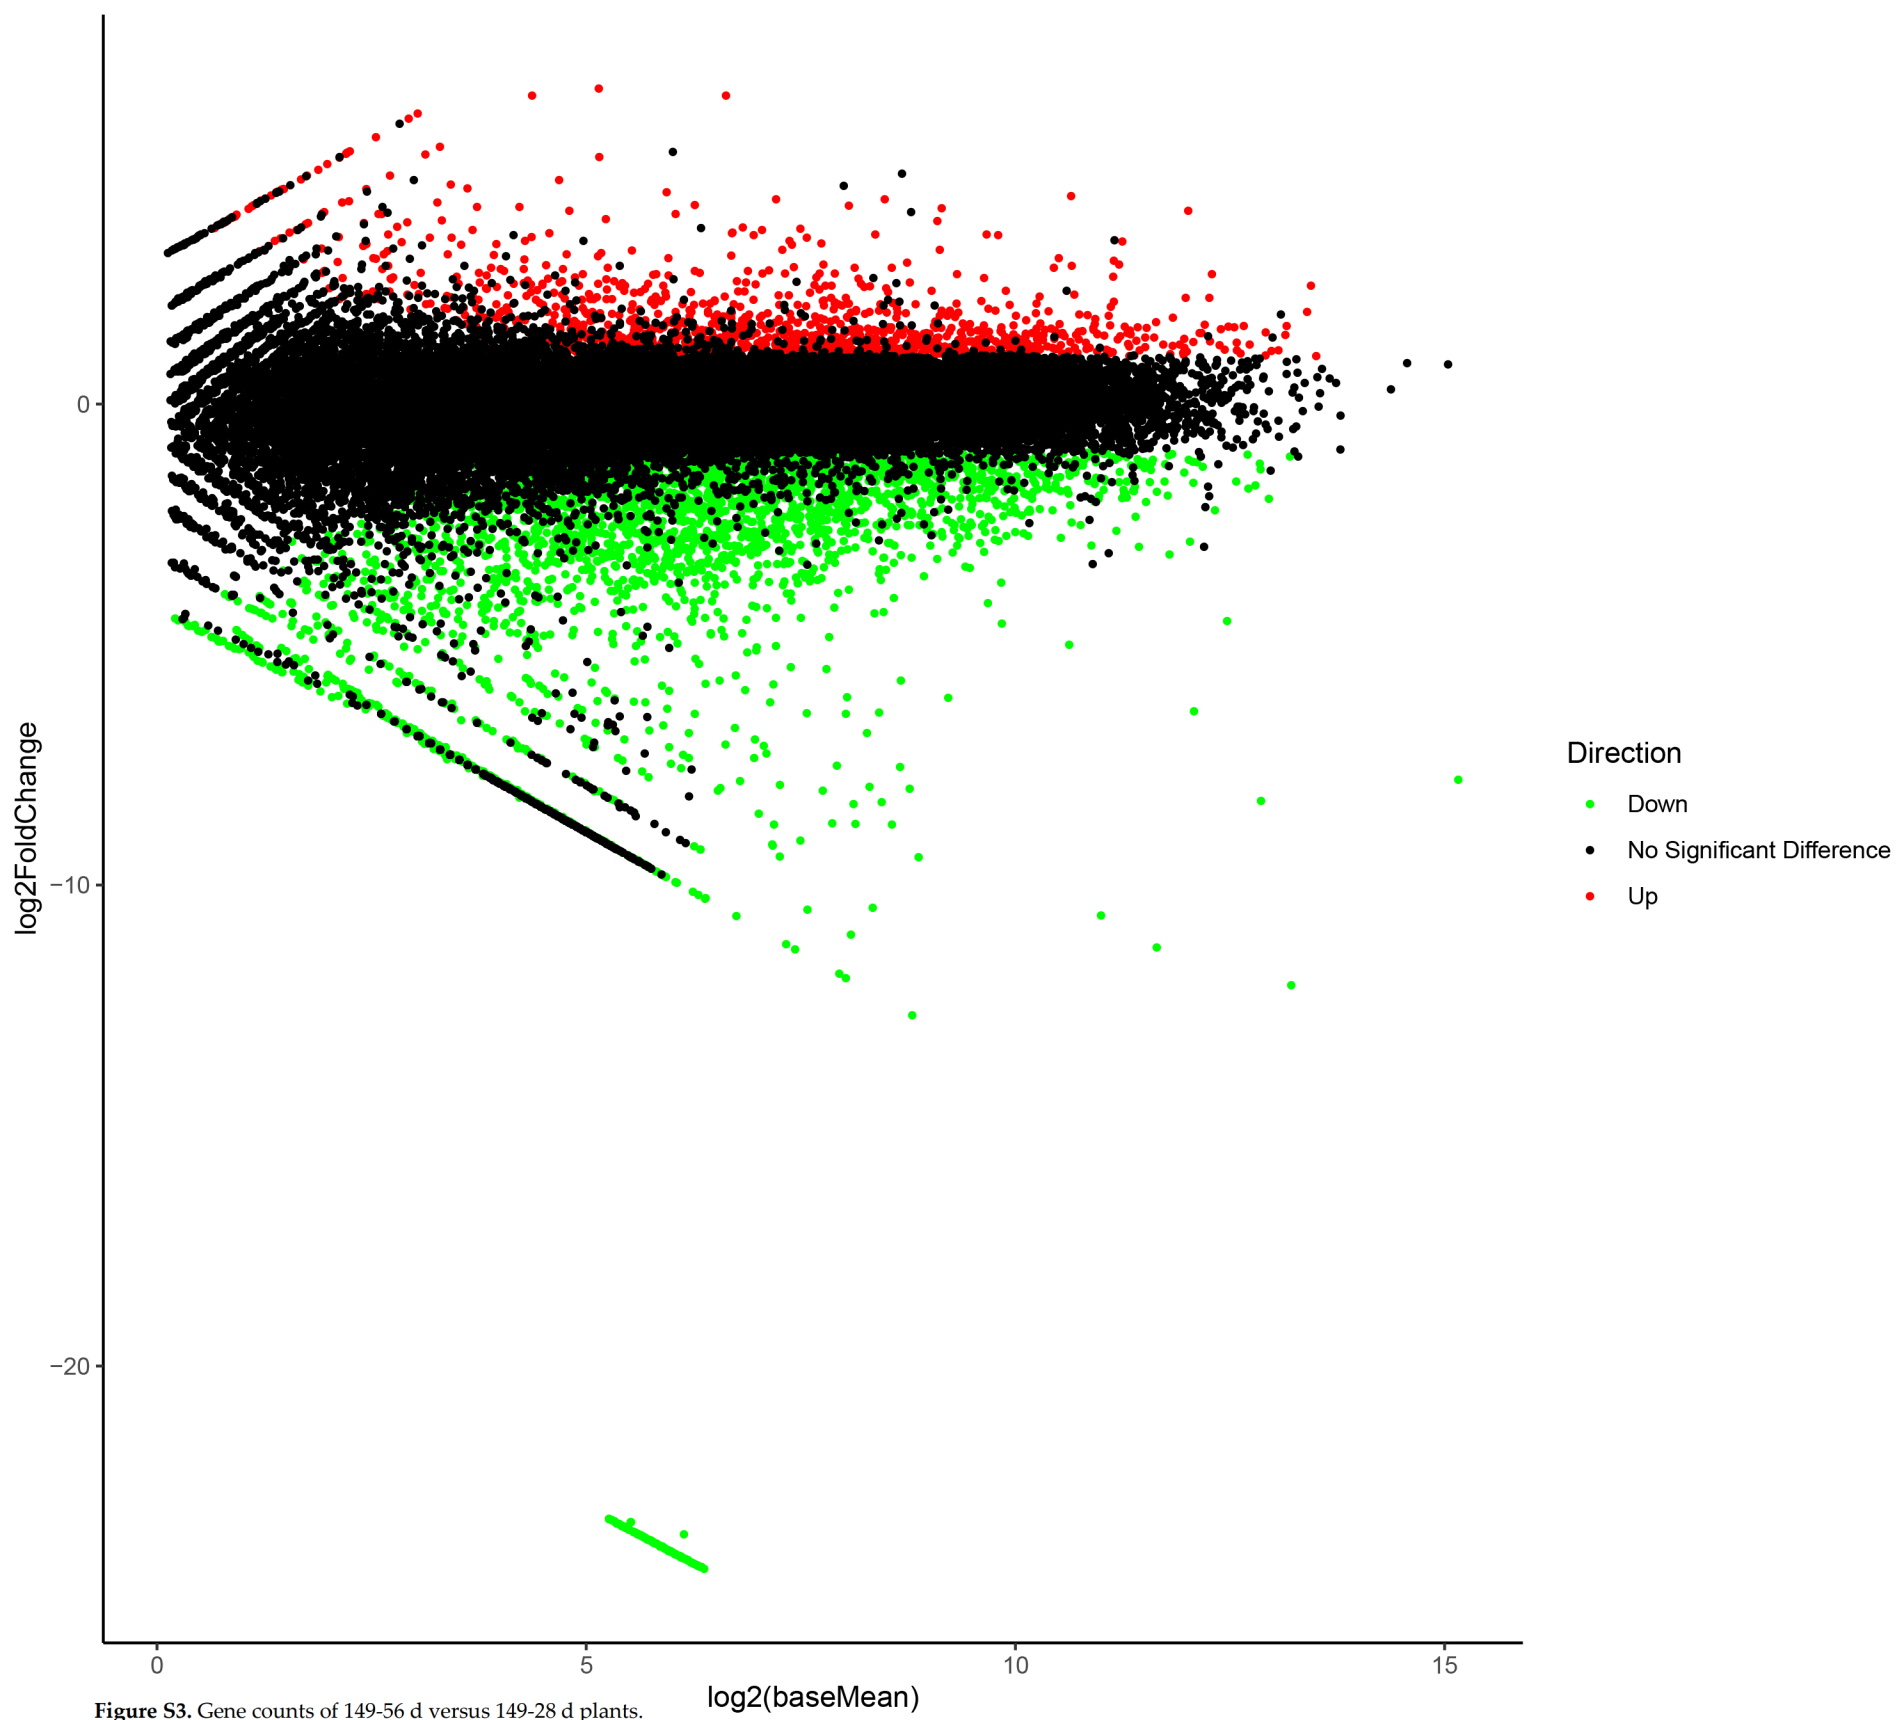

**Figure S3.** Gene counts of 149-56 d versus 149-28 d plants.

Supplement: s1 [file s1]
